# Supplementary material for: Equilibrium structures of the tetramezine diastereomers and their ratio: joint analysis of gas phase electron diffraction, quantum chemistry, and spectroscopic data
Source: Royal Society of Chemistry journal article supplement (doi:10.1039/c8cp07607c), 2019-01-01
Supplement: c8cp07607c1.pdf [file c8cp07607c1.pdf]

## Electronic Supplementary Information (ESI)

### **Equilibrium structures of the tetramazine diastereomers and their ratio: joint analysis of gas phase electron diffraction, quantum chemistry, and spectroscopic data**

**Leonid S. Khaikin,<sup>\*a</sup> Igor V. Kochikov,<sup>b</sup> Anatoliy N. Rykov,<sup>a</sup> Olga E. Grikina,<sup>a</sup> Georgiy G. Ageev,<sup>a</sup> Igor F. Shishkov,<sup>a</sup> Vladimir V. Kuznetsov<sup>c</sup> and Nina N. Makhova<sup>c</sup>**

<sup>a</sup> Chemistry Department, M. V. Lomonosov Moscow State University, 119991 Moscow, Russia

<sup>b</sup> Scientific Research Computer Center, M. V. Lomonosov Moscow State University, 119991 Moscow, Russia

<sup>c</sup> N.D. Zelinsky Institute of Organic Chemistry, Russian Academy of Sciences, 47 Leninsky prosp., 119991 Moscow, Russia

\* Corresponding author

E-mail address: lskhaikin@rambler.ru

## Contents

|                                                                                                                                                                                                                                                                                                                                                                  |            |
|------------------------------------------------------------------------------------------------------------------------------------------------------------------------------------------------------------------------------------------------------------------------------------------------------------------------------------------------------------------|------------|
| <b>1. Synthesis of 1,2-bis-(3,3-dimethyldiaziridin-1-yl)ethane (tetramezine).<br/>Experimental.</b>                                                                                                                                                                                                                                                              | <b>3</b>   |
| <b>Figure S1</b> IR spectrum of crystalline <i>meso</i> -form of tetramezine                                                                                                                                                                                                                                                                                     | <b>4</b>   |
| <b>2. NMR spectra of the <i>meso</i> form of tetramezine</b>                                                                                                                                                                                                                                                                                                     | <b>5</b>   |
| <b>Figure S2</b> <sup>1</sup> H NMR spectrum of 1,2-bis-(3,3-dimethyldiaziridin-1-yl)ethane, <i>S<sub>N</sub>S<sub>N</sub>-R<sub>N</sub><sup>•</sup>R<sub>N</sub><sup>•</sup></i><br>(solution in CDCl <sub>3</sub> ).                                                                                                                                           | <b>5</b>   |
| <b>Figure S3</b> <sup>13</sup> C NMR spectrum of 1,2-bis-(3,3-dimethyldiaziridin-1-yl)ethane, <i>S<sub>N</sub>S<sub>N</sub>-R<sub>N</sub><sup>•</sup>R<sub>N</sub><sup>•</sup></i><br>(solution in CDCl <sub>3</sub> ).                                                                                                                                          | <b>6</b>   |
| <b>Figure S4</b> 2D NMR spectrum { <sup>1</sup> H- <sup>13</sup> C} HSQC of 1,2-bis-(3,3-dimethyldiaziridin-1-yl)ethane,<br><i>S<sub>N</sub>S<sub>N</sub>-R<sub>N</sub><sup>•</sup>R<sub>N</sub><sup>•</sup></i> (solution in CDCl <sub>3</sub> ).                                                                                                               | <b>7</b>   |
| <b>Figure S6</b> 2D NMR spectrum { <sup>1</sup> H- <sup>13</sup> C} HMBC of 1,2-bis-(3,3-dimethyldiaziridin-1-yl)ethane,<br><i>S<sub>N</sub>S<sub>N</sub>-R<sub>N</sub><sup>•</sup>R<sub>N</sub><sup>•</sup></i> (solution in CDCl <sub>3</sub> ).                                                                                                               | <b>8</b>   |
| <b>Figure S6</b> 2D NMR spectrum { <sup>1</sup> H- <sup>1</sup> H} gNOESY of 1,2-bis-(3,3-dimethyldiaziridin-1-yl)ethane,<br><i>S<sub>N</sub>S<sub>N</sub>-R<sub>N</sub><sup>•</sup>R<sub>N</sub><sup>•</sup></i> (solution in CDCl <sub>3</sub> ).                                                                                                              | <b>9</b>   |
| <b>3. Interpretation of the experimental IR spectrum</b>                                                                                                                                                                                                                                                                                                         | <b>10</b>  |
| <b>Table S1</b> Redundant set of internal vibrational coordinates for tetramezine.                                                                                                                                                                                                                                                                               | <b>10-</b> |
| <b>4. The experimental GED data and the structural analysis results</b>                                                                                                                                                                                                                                                                                          | <b>10</b>  |
| <b>Table S2</b> The total scattering intensity functions <i>I<sup>tot</sup>(s)</i> and the background lines <i>I<sup>b</sup>(s)</i> for<br>tetramezine. Long camera distance (LD=362.3 mm).                                                                                                                                                                      | <b>10</b>  |
| <b>Table S3</b> The total scattering intensity functions <i>I<sup>tot</sup>(s)</i> and the background lines <i>I<sup>b</sup>(s)</i> for<br>tetramezine. Short camera distance (SD=193.3 mm).                                                                                                                                                                     | <b>13</b>  |
| <b>Table S4</b> Equilibrium ( <i>r<sub>e</sub></i> ) and thermal-average ( <i>r<sub>g</sub></i> , <i>r<sub>a</sub></i> ) distances, vibrational corrections (see<br>text for the notations), and mean amplitudes ( <i>u</i> ) for internuclear distances of the<br><i>meso</i> form of tetramezine obtained for 359 K at the GED(MP2) refinement (in Å).         | <b>15</b>  |
| <b>Table S5</b> Equilibrium ( <i>r<sub>e</sub></i> ) and thermal-average ( <i>r<sub>g</sub></i> , <i>r<sub>a</sub></i> ) distances, vibrational corrections (see<br>text for the notations) and mean amplitudes ( <i>u</i> ) for internuclear distances for<br><i>enantiomeric</i> forms of tetramezine obtained for 359 K at the GED(MP2) refinement<br>(in Å). | <b>19</b>  |
| <b>Table S6</b> Cartesian coordinates of the <i>meso</i> form of tetramezine obtained at the GED(MP2)<br>refinement.                                                                                                                                                                                                                                             | <b>23</b>  |
| <b>Table S7</b> Cartesian coordinates of the <i>enantiomeric</i> form of tetramezine obtained at the<br>GED(MP2) refinement.                                                                                                                                                                                                                                     | <b>24</b>  |
| <b>Table S8</b> Cartesian coordinates of the <i>meso</i> form of tetramezine obtained at the GED(B3LYP)<br>refinement.                                                                                                                                                                                                                                           | <b>25</b>  |
| <b>Table S9</b> Cartesian coordinates of the <i>enantiomeric</i> form of tetramezine obtained at the<br>GED(B3LYP) refinement.                                                                                                                                                                                                                                   | <b>26</b>  |
| <b>Table S10</b> Correlation matrix for the GED (B3LYP) refinement of the geometrical parameters<br>united in the independent groups.                                                                                                                                                                                                                            | <b>27</b>  |
| <b>Table S11</b> Correlation matrix for the GED (MP2) refinement of the geometrical parameters<br>united in the independent groups.                                                                                                                                                                                                                              | <b>27</b>  |
| <b>5. Results of the quantum-chemical calculations</b>                                                                                                                                                                                                                                                                                                           | <b>28</b>  |
| <b>Table S12</b> Cartesian coordinates of the <i>meso</i> form of tetramezine found by the MP2/cc-pVTZ<br>calculation.                                                                                                                                                                                                                                           | <b>28</b>  |
| <b>Table S13</b> Cartesian coordinates of the <i>enantiomeric</i> form of tetramezine found by the<br>MP2/cc-pVTZ calculation.                                                                                                                                                                                                                                   | <b>29</b>  |
| <b>Table S14</b> Cartesian coordinates of the <i>meso</i> form of tetramezine found by the B3LYP/cc-<br>pVTZ calculation.                                                                                                                                                                                                                                        | <b>30</b>  |
| <b>Table S15</b> Cartesian coordinates of the <i>enantiomeric</i> form of tetramezine found by the B3LYP<br>/cc-pVTZ calculation.                                                                                                                                                                                                                                | <b>31</b>  |

## 1. Synthesis of 1,2-*bis*-(3,3-dimethyldiaziridin-1-yl)ethane (tetramezine).

Commercially available chemicals were purchased from the ACROS catalog and were used as received.

1,2-*bis*-(3,3-dimethyldiaziridin-1-yl)ethane (tetramezine),  $S_N S_N - R_N R_N$  was for the first time synthesized at the N. D. Zelinsky Institute of Organic Chemistry, Russian Academy of Sciences (RAS).

22.7 g (0.10 mol) acetone oxime *p*-toluenesulfonate (prepared according to the synthesis of acetone oxime benzenesulfonate by Oxley and Short) were dissolved in 20 ml dichloromethane. At a temperature of 10–158°C, 3.0 g ethylenediamine and 15 g triethylamine were added. The reaction mixture was stirred for 24 h at room temperature and for 4 days at 25–308°C. Then, 40 ml dichloromethane and 15 g finely ground potassium carbonate were added. After stirring the mixture for 5 h, the precipitate was filtered off and washed with 25 ml dichloromethane. After solvent evaporation by arotary evaporator at a bath temperature of 408°C and crystallization from acetone with fast cooling and stirring, 6.2 g of the diastereomeric mixture of tetramezine was collected by filtration. The *meso* form was isolated in high purity by recrystallizing the diastereomeric mixture from acetone under slow cooling and fully characterized by IR, NMR, HR-MS, and X-ray diffraction analysis.

## Experimental

The IR spectrum of the *meso*-tetramezine was recorded on a “Nicolet Magna 750” (USA) spectrometer in the range 400-4000  $\text{cm}^{-1}$  (resolution 2  $\text{cm}^{-1}$ ) as pellets with KBr.

IR-spectrum ( $\text{v}/\text{cm}^{-1}$ , Figure S1): 428, 507, 542, 656, 758, 807, 826, 977, 1004, 1073, 1103, 1127, 1208, 1274, 1301, 1320, 1351, 1383, 1448, 1464, 2863, 2934, 2964, 3006, 3213.

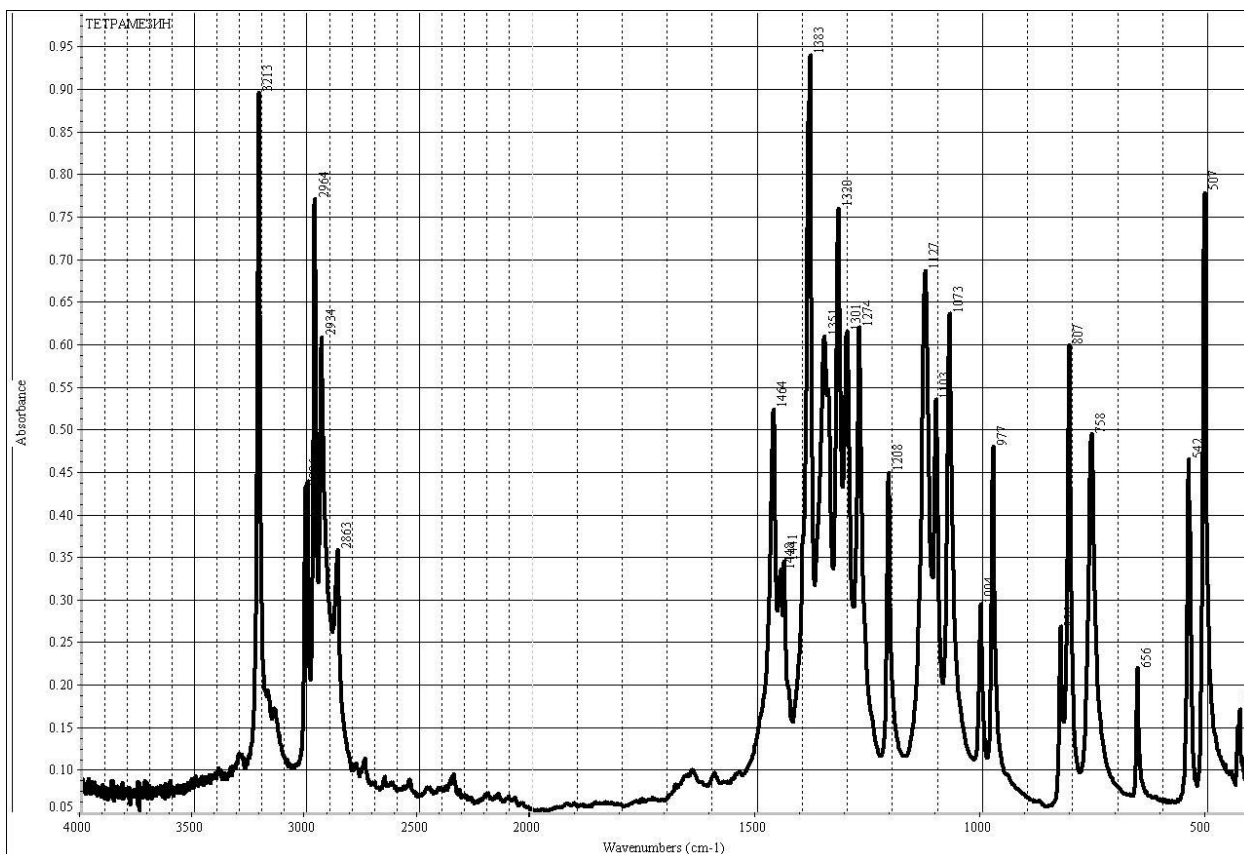

**Fig. S1.** IR spectrum of crystalline *meso*-form of tetramezine

Mass spectra were measured using a Finnigan MAT INCOS-50 instrument. High resolution mass spectra were recorded on a Bruker microTOF spectrometer with electrospray ionization (ESI). All measurements were performed in a positive (+MS) ion mode (interface capillary voltage: 4500 V) with scan range  $m/z$ : 50-3000.

HRMS (ESI):  $m/z$  for  $C_8H_{18}N_4 (M+H)^+$ : calcd 171.1604, found 171.1608;  $m/z$  for  $C_8H_{18}N_4 [M+Na]^+$ : calcd 193.1424, found 193.1427.; Mass-spectra (EI, 70 eV),  $m/z$ : 170  $[M]^+$ , 155  $[M - Me]^+$ , 139  $[M - 2Me - H]^+$ , 125  $[M - 3Me]^+$ , 111  $[M - 4Me + H]^+$ , 85  $[M - -CH_2-N-C_{ring}(Me_2)-NH]^+$ , 70  $[M - -CH_2-N-C_{ring}(Me_2)-NH - Me]^+$ , 56  $[M - -CH_2-N-C_{ring}(Me_2)-NH - 2Me + H]^+$ .

## 2. NMR spectra

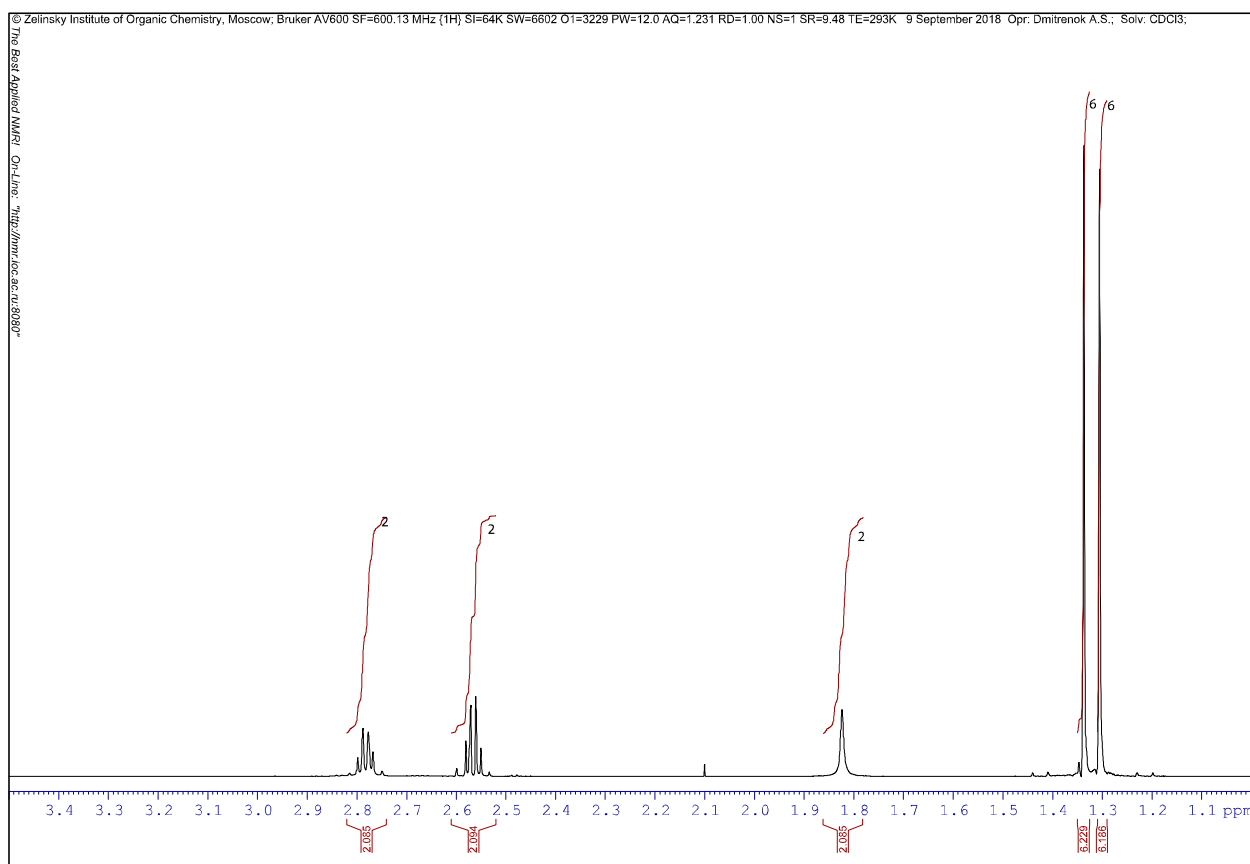

**Fig. S2.**  $^1\text{H}$  NMR spectrum of 1,2-bis-(3,3-dimethyldiaziridin-1-yl)ethane,  $S_N S_N - R_N R_N$  (solution in  $\text{CDCl}_3$ ).

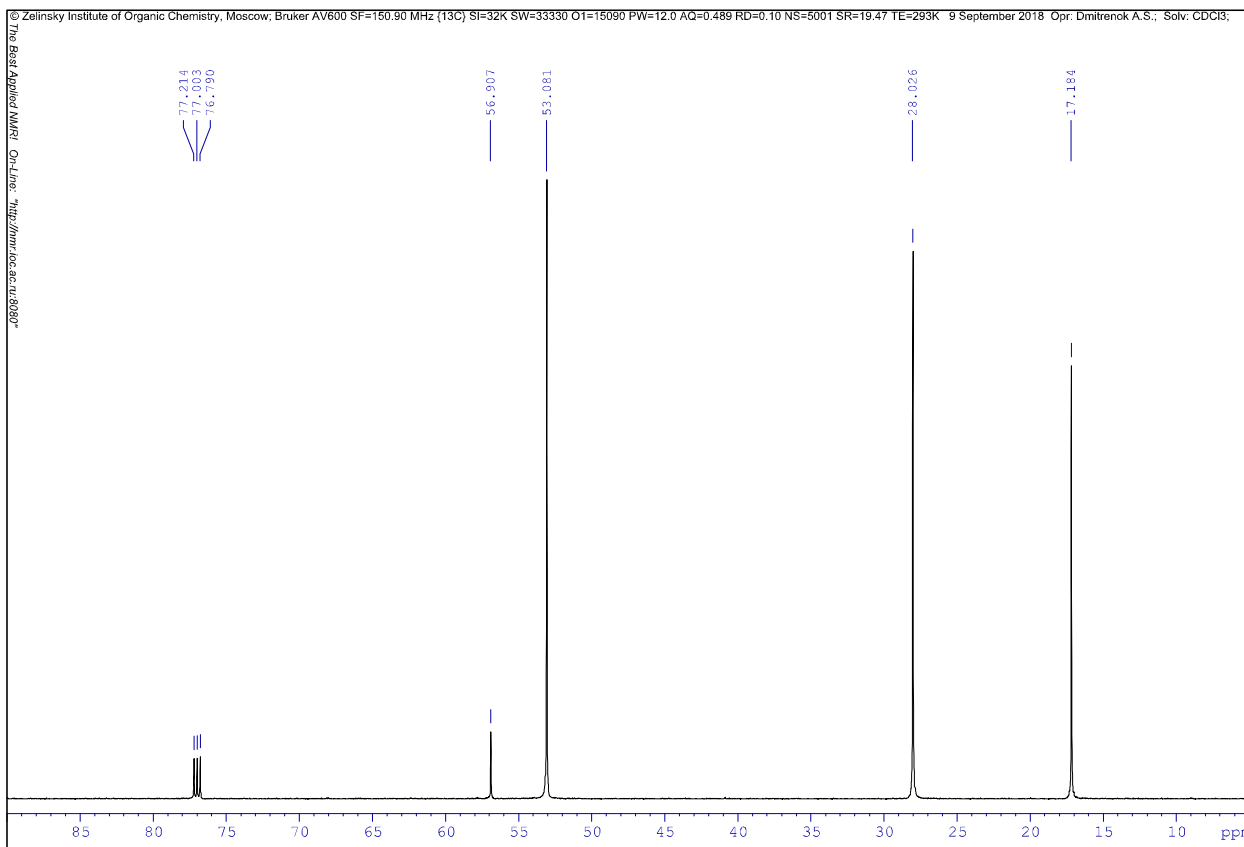

**Fig.S3.**  $^{13}\text{C}$  NMR spectrum of 1,2-bis-(3,3-dimethyldiaziridin-1-yl)ethane,  $S_N S_N - R_N R_{N'}$  (solution in  $\text{CDCl}_3$ ).

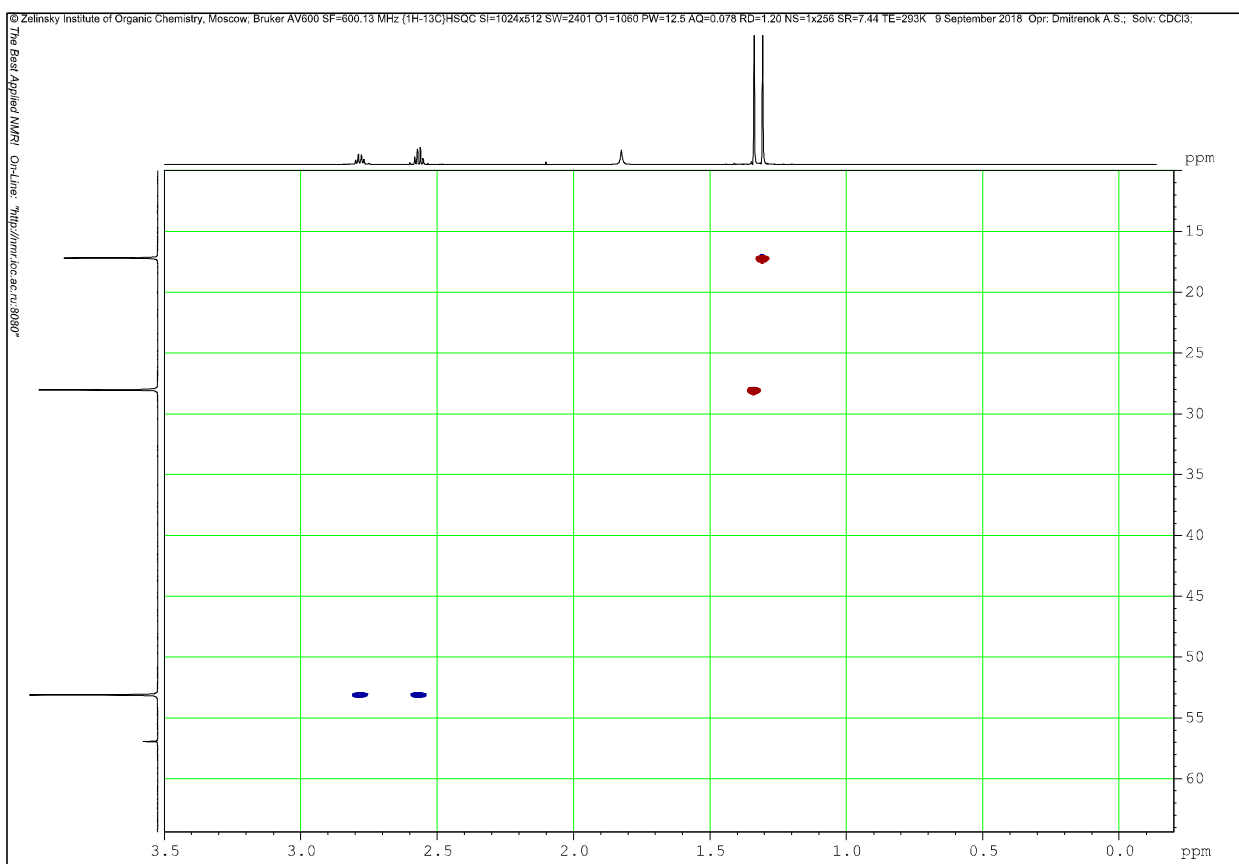

**Fig.S4.** 2D NMR spectrum  $\{^1\text{H}-^{13}\text{C}\}$  HMBC of 1,2-*bis*-(3,3-dimethyldiaziridin-1-yl)ethane,  $S_N S_N-R_N R_N'$  (solution in  $\text{CDCl}_3$ ).

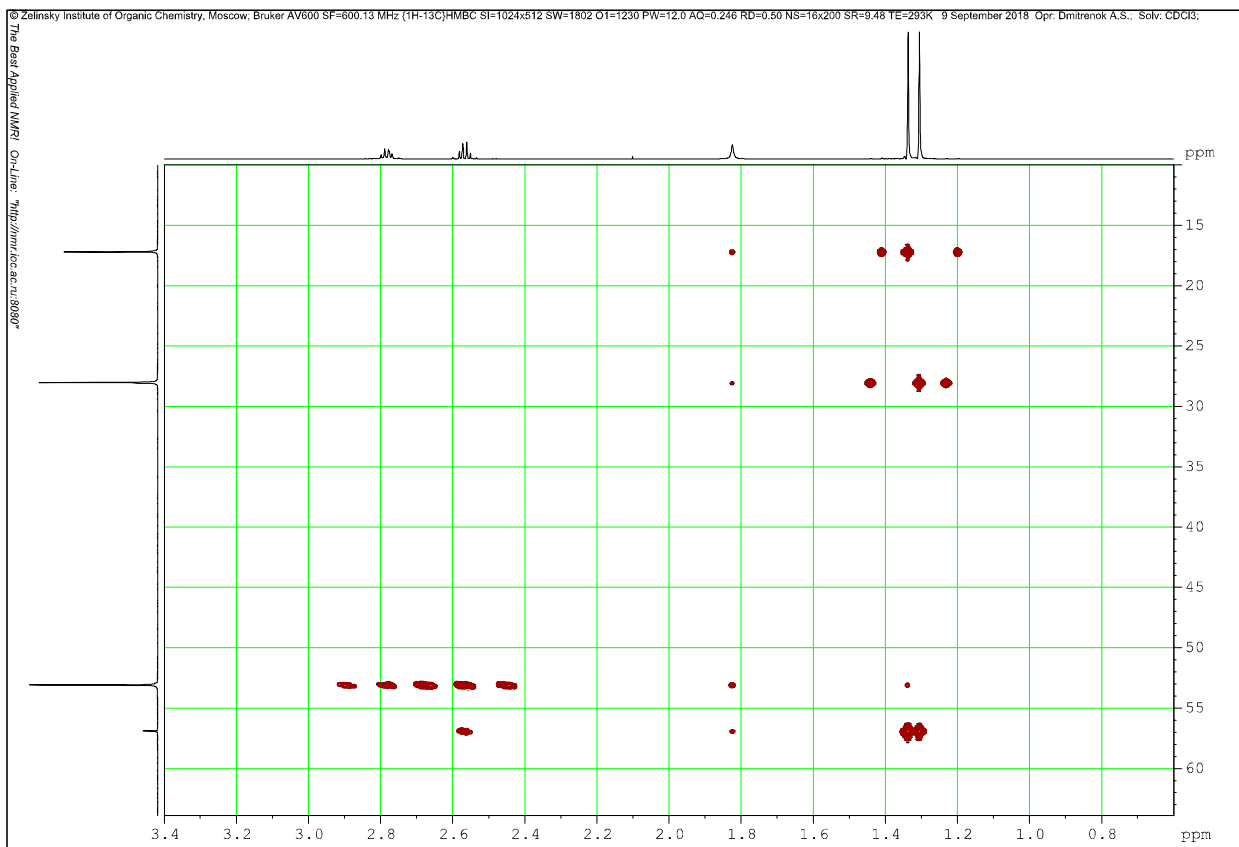

**Fig.S5.** 2D NMR spectrum  $\{^1\text{H}-^{13}\text{C}\}$  HMBC of 1,2-*bis*-(3,3-dimethyldiaziridin-1-yl)ethane,  $S_N S_N-R_N R_N$  (solution in  $\text{CDCl}_3$ ).



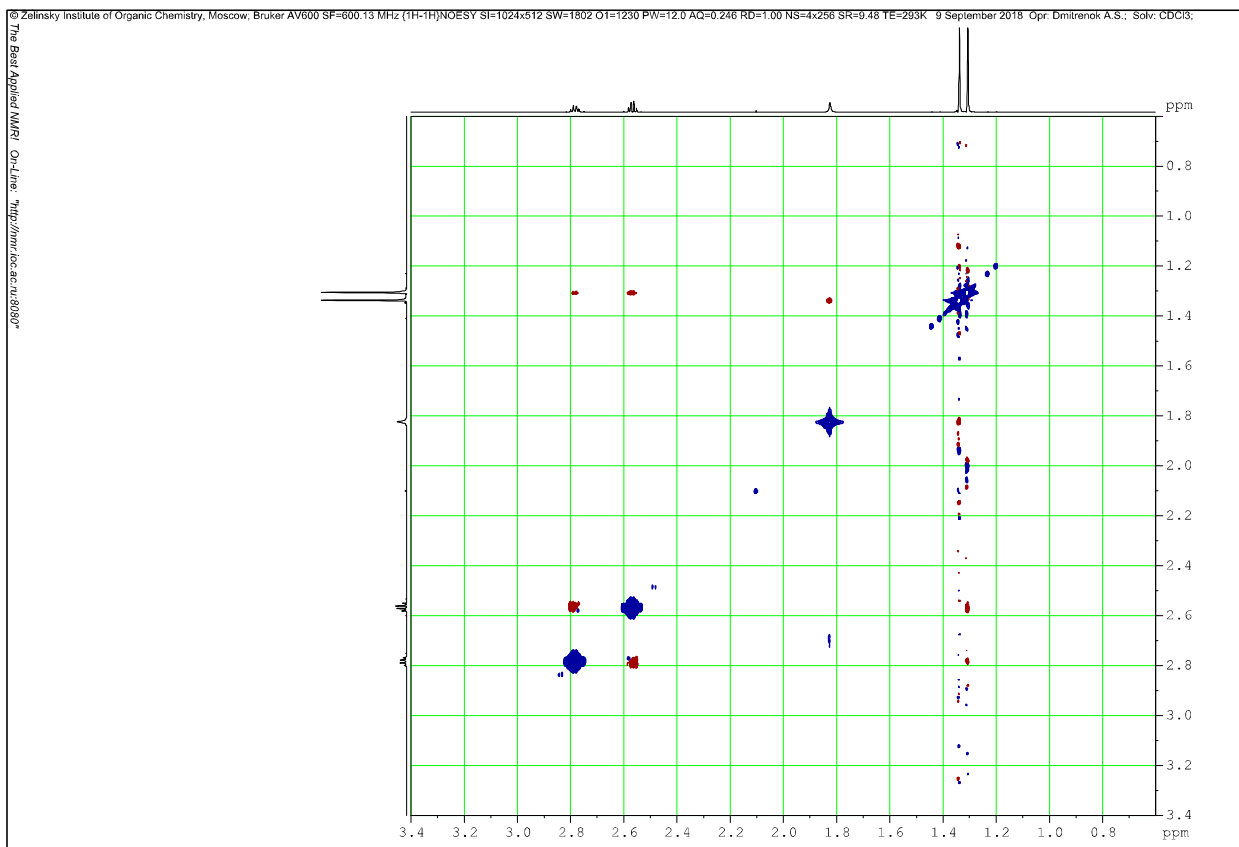

**Fig.S6.** 2D NMR spectrum  $\{^1\text{H}-^1\text{H}\}$ gNOESY of 1,2-bis-(3,3-dimethyldiaziridin-1-yl)ethane,  $S_N S_N - R_N R_N$  (solution in  $\text{CDCl}_3$ ).

### 3. Interpretation of the experimental IR spectrum

**Table S1.** Redundant set of internal vibrational coordinates for tetramazine.

| №                             | Notation | Atom group | №                                        | Notation  | Atom group                        |
|-------------------------------|----------|------------|------------------------------------------|-----------|-----------------------------------|
| <i>Stretching coordinates</i> |          |            | <i>Bending coordinates</i>               |           |                                   |
| 1                             | C1C2     | C1–C2      | 50                                       | H22N20N19 | H22–N20–N19                       |
| 2                             | C1H3     | C1–H3      | 51                                       | H22N20C21 | H22–N20–C21                       |
| 3                             | C1H4     | C1–H4      | 52                                       | C9C7C10   | C9–C7–C10                         |
| 4                             | C1N5     | C1–N5      | 53                                       | N5C7C9    | N5–C7–C9                          |
| 5                             | N5N6     | N5–N6      | 54                                       | N5C7C10   | N5–C7–C10                         |
| 6                             | N5C7     | N5–C7      | 55                                       | N6C7C9    | N6–C7–C9                          |
| 7                             | N6C7     | N6–C7      | 56                                       | N6C7C10   | N6–C7–C10                         |
| 8                             | N6H8     | N6–H8      | 57                                       | C23C21C24 | C23–C21–C24                       |
| 9                             | C7C9     | C7–C9      | 58                                       | N19C21C23 | N19–C21–C23                       |
| 10                            | C7C10    | C7–C10     | 59                                       | N19C21C24 | N19–C21–C24                       |
| 11                            | C9H11    | C9–H11     | 60                                       | N20C21C23 | N20–C21–C23                       |
| 12                            | C9H12    | C9–H12     | 61                                       | N20C21C24 | N20–C21–C24                       |
| 13                            | C9H13    | C9–H13     | 62                                       | C7C9H11   | C7–C9–H11                         |
| 14                            | C10H14   | C10–H14    | 63                                       | C7C9H12   | C7–C9–H12                         |
| 15                            | C10H15   | C10–H15    | 64                                       | C7C9H13   | C7–C9–H13                         |
| 16                            | C10H16   | C10–H16    | 65                                       | C7C10H14  | C7–C10–H14                        |
| 17                            | C2H17    | C2–H17     | 66                                       | C7C10H15  | C7–C10–H15                        |
| 18                            | C2H18    | C2–H18     | 67                                       | C7C10H16  | C7–C10–H16                        |
| 19                            | C2N19    | C2–N19     | 68                                       | H12C9H13  | H12–C9–H13                        |
| 20                            | N19N20   | N19–N20    | 69                                       | H11C9H13  | H11–C9–H13                        |
| 21                            | N19C21   | N19–C21    | 70                                       | H11C9H12  | H11–C9–H12                        |
| 22                            | N20C21   | N20–C21    | 71                                       | H15C10H16 | H15–C10–H16                       |
| 23                            | N20H22   | N20–H22    | 72                                       | H14C10H16 | H14–C10–H16                       |
| 24                            | C21C23   | C21–C23    | 73                                       | H14C10H15 | H14–C10–H15                       |
| 25                            | C21C24   | C21–C24    | 74                                       | C21C23H25 | C21–C23–H25                       |
| 26                            | C23H25   | C23–H25    | 75                                       | C21C23H26 | C21–C23–H26                       |
| 27                            | C23H26   | C23–H26    | 76                                       | C21C23H27 | C21–C23–H27                       |
| 28                            | C23H27   | C23–H27    | 77                                       | C21C24H28 | C21–C24–H28                       |
| 29                            | C24H28   | C24–H28    | 78                                       | C21C24H29 | C21–C24–H29                       |
| 30                            | C24H29   | C24–H29    | 79                                       | C21C24H30 | C21–C24–H30                       |
| 31                            | C24H30   | C24–H30    | 80                                       | H26C23H27 | H26–C23–H27                       |
| <i>Bending coordinates</i>    |          |            | 81                                       | H25C23H27 | H25–C23–H27                       |
| 32                            | C2C1H3   | C2–C1–H3   | 82                                       | H25C23H26 | H25–C23–H26                       |
| 33                            | C2C1H4   | C2–C1–H4   | 83                                       | H29C24H30 | H29–C24–H30                       |
| 34                            | C2C1N5   | C2–C1–N5   | 84                                       | H28C24H30 | H28–C24–H30                       |
| 35                            | H3C1H4   | H3–C1–H4   | 85                                       | H28C24H29 | H28–C24–H29                       |
| 36                            | H3C1N5   | H3–C1–N5   | <i>Wagging vibrations (out of plane)</i> |           |                                   |
| 37                            | H4C1N5   | H4–C1–N5   | 86                                       | C1wag     | C1–N5 / N5N6C7                    |
| 38                            | C1C2H17  | C1–C2–H17  | 87                                       | C2wag     | C2–N19 / N19N20C21                |
| 39                            | C1C2H18  | C1–C2–H18  | 88                                       | H8wag     | H8–N6 / N6N5C7                    |
| 40                            | C1C2N19  | C1–C2–N19  | 89                                       | H22wag    | H22–N20 / N20N19C21               |
| 41                            | H17C2H18 | H17–C2–H18 | <i>Torsional vibrations</i>              |           |                                   |
| 42                            | H17C2N19 | H17–C2–N19 | 90                                       | TC1C2     | (H3,H4,N5)C1–C2(N19,H18,H17)      |
| 43                            | H18C2N19 | H18–C2–N19 | 91                                       | TC1N5     | (C2,H3,H4)C1–N5(N6,C7)            |
| 44                            | C1N5N6   | C1–N5–N6   | 92                                       | TC2N19    | (C1,H17,H18)C2–N19(N20,C21)       |
| 45                            | C1N5C7   | C1–N5–C7   | 93                                       | TC7C9     | (N5,N6,C10)C7–C9(H11,H12,H13)     |
| 46                            | C2N19N20 | C2–N19–N20 | 94                                       | TC7C10    | (N5,N6,C9)C7–C10(H14,H15,H16)     |
| 47                            | C2N19C21 | C2–N19–C21 | 95                                       | TC21C23   | (N19,N20,C24)C21–C23(H25,H26,H27) |
| 48                            | H8N6N5   | H8–N6–N5   | 96                                       | TC21C24   | (N19,N20,C23)C21–C24(H28,H29,H30) |
| 49                            | H8N6C7   | H8–N6–C7   |                                          |           |                                   |

#### 4. Experimental GED data for structural analysis and the refinement results

**Table S2.** The total scattering intensity functions  $I^{tot}(s)$  and the background lines  $I^b(s)$  for tetramazine. Long camera distance (LD=362.3 mm).

The used diffraction pattern no.1

| $S$   | $I^{tot}(s)$ | $I^b(s)$ | $s$    | $I^{tot}(s)$ | $I^b(s)$ | $s$    | $I^{tot}(s)$ | $I^b(s)$ |
|-------|--------------|----------|--------|--------------|----------|--------|--------------|----------|
| 3.125 | 0.38574      | 0.41703  | 8.500  | 0.41020      | 0.39940  | 13.875 | 0.33616      | 0.32526  |
| 3.250 | 0.39919      | 0.42974  | 8.625  | 0.40766      | 0.39640  | 14.000 | 0.33276      | 0.32474  |
| 3.375 | 0.39972      | 0.44143  | 8.750  | 0.40470      | 0.39353  | 14.125 | 0.32946      | 0.32428  |
| 3.500 | 0.40285      | 0.45207  | 8.875  | 0.40105      | 0.39077  | 14.250 | 0.32656      | 0.32390  |
| 3.625 | 0.40119      | 0.46167  | 9.000  | 0.39718      | 0.38812  | 14.375 | 0.32405      | 0.32358  |
| 3.750 | 0.39969      | 0.47023  | 9.125  | 0.39376      | 0.38557  | 14.500 | 0.32192      | 0.32332  |
| 3.875 | 0.40125      | 0.47777  | 9.250  | 0.39032      | 0.38312  | 14.625 | 0.32043      | 0.32312  |
| 4.000 | 0.40353      | 0.48431  | 9.375  | 0.38756      | 0.38076  | 14.750 | 0.31933      | 0.32296  |
| 4.125 | 0.41363      | 0.48986  | 9.500  | 0.38508      | 0.37847  | 14.875 | 0.31846      | 0.32286  |
| 4.250 | 0.42264      | 0.49446  | 9.625  | 0.38326      | 0.37626  | 15.000 | 0.31780      | 0.32279  |
| 4.375 | 0.43881      | 0.49813  | 9.750  | 0.38125      | 0.37411  | 15.125 | 0.31761      | 0.32275  |
| 4.500 | 0.45617      | 0.50092  | 9.875  | 0.38005      | 0.37202  | 15.250 | 0.31749      | 0.32273  |
| 4.625 | 0.47417      | 0.50285  | 10.000 | 0.37870      | 0.36998  | 15.375 | 0.31722      | 0.32273  |
| 4.750 | 0.49240      | 0.50398  | 10.125 | 0.37737      | 0.36799  | 15.500 | 0.31715      | 0.32275  |
| 4.875 | 0.51246      | 0.50435  | 10.250 | 0.37540      | 0.36603  | 15.625 | 0.31642      | 0.32276  |
| 5.000 | 0.53625      | 0.50400  | 10.375 | 0.37262      | 0.36412  | 15.750 | 0.31553      | 0.32277  |
| 5.125 | 0.55825      | 0.50300  | 10.500 | 0.36860      | 0.36223  | 15.875 | 0.31465      | 0.32276  |
| 5.250 | 0.57478      | 0.50139  | 10.625 | 0.36303      | 0.36038  | 16.000 | 0.31370      | 0.32275  |
| 5.375 | 0.58443      | 0.49923  | 10.750 | 0.35683      | 0.35855  | 16.125 | 0.31334      | 0.32271  |
| 5.500 | 0.58783      | 0.49659  | 10.875 | 0.35006      | 0.35674  | 16.250 | 0.31282      | 0.32264  |
| 5.625 | 0.58277      | 0.49351  | 11.000 | 0.34373      | 0.35496  | 16.375 | 0.31273      | 0.32255  |
| 5.750 | 0.57088      | 0.49005  | 11.125 | 0.33776      | 0.35320  | 16.500 | 0.31360      | 0.32244  |
| 5.875 | 0.55410      | 0.48628  | 11.250 | 0.33288      | 0.35146  | 16.625 | 0.31468      | 0.32230  |
| 6.000 | 0.53354      | 0.48224  | 11.375 | 0.32917      | 0.34975  | 16.750 | 0.31601      | 0.32214  |
| 6.125 | 0.51120      | 0.47798  | 11.500 | 0.32624      | 0.34807  | 16.875 | 0.31784      | 0.32196  |
| 6.250 | 0.48846      | 0.47356  | 11.625 | 0.32484      | 0.34641  | 17.000 | 0.31967      | 0.32178  |
| 6.375 | 0.46729      | 0.46902  | 11.750 | 0.32441      | 0.34479  | 17.125 | 0.32154      | 0.32160  |
| 6.500 | 0.44795      | 0.46440  | 11.875 | 0.32493      | 0.34320  | 17.250 | 0.32346      | 0.32144  |
| 6.625 | 0.43295      | 0.45973  | 12.000 | 0.32629      | 0.34164  | 17.375 | 0.32526      | 0.32131  |
| 6.750 | 0.42174      | 0.45506  | 12.125 | 0.32827      | 0.34013  | 17.500 | 0.32708      | 0.32123  |
| 6.875 | 0.41343      | 0.45041  | 12.250 | 0.33088      | 0.33867  | 17.625 | 0.32832      | 0.32122  |
| 7.000 | 0.40772      | 0.44581  | 12.375 | 0.33372      | 0.33725  | 17.750 | 0.32960      | 0.32129  |
| 7.125 | 0.40444      | 0.44128  | 12.500 | 0.33702      | 0.33589  | 17.875 | 0.33076      | 0.32148  |
| 7.250 | 0.40289      | 0.43684  | 12.625 | 0.33998      | 0.33458  | 18.000 | 0.33135      | 0.32180  |
| 7.375 | 0.40354      | 0.43250  | 12.750 | 0.34296      | 0.33333  | 18.125 | 0.33224      | 0.32228  |
| 7.500 | 0.40494      | 0.42828  | 12.875 | 0.34521      | 0.33215  | 18.250 | 0.33294      | 0.32294  |
| 7.625 | 0.40668      | 0.42419  | 13.000 | 0.34685      | 0.33103  | 18.375 | 0.33307      | 0.32381  |
| 7.750 | 0.40885      | 0.42023  | 13.125 | 0.34775      | 0.32999  | 18.500 | 0.33308      | 0.32491  |
| 7.875 | 0.41091      | 0.41641  | 13.250 | 0.34772      | 0.32901  | 18.625 | 0.33299      | 0.32626  |
| 8.000 | 0.41230      | 0.41273  | 13.375 | 0.34702      | 0.32811  | 18.750 | 0.33268      | 0.32787  |
| 8.125 | 0.41301      | 0.40919  | 13.500 | 0.34524      | 0.32729  | 18.875 | 0.33298      | 0.32975  |
| 8.250 | 0.41289      | 0.40579  | 13.625 | 0.34262      | 0.32654  | 19.000 | 0.33323      | 0.33191  |
| 8.375 | 0.41194      | 0.40253  | 13.750 | 0.33960      | 0.32586  |        |              |          |

The used diffraction pattern no.2

| $s$   | $I^{tot}(s)$ | $I^b(s)$ | $s$    | $I^{tot}(s)$ | $I^b(s)$ | $s$    | $I^{tot}(s)$ | $I^b(s)$ |
|-------|--------------|----------|--------|--------------|----------|--------|--------------|----------|
| 3.125 | 0.38605      | 0.41842  | 8.500  | 0.40685      | 0.39593  | 13.875 | 0.32951      | 0.31883  |
| 3.250 | 0.39892      | 0.43014  | 8.625  | 0.40399      | 0.39290  | 14.000 | 0.32597      | 0.31818  |
| 3.375 | 0.39949      | 0.44102  | 8.750  | 0.40115      | 0.38998  | 14.125 | 0.32252      | 0.31759  |
| 3.500 | 0.40151      | 0.45103  | 8.875  | 0.39763      | 0.38717  | 14.250 | 0.31961      | 0.31706  |
| 3.625 | 0.39942      | 0.46015  | 9.000  | 0.39331      | 0.38447  | 14.375 | 0.31714      | 0.31658  |
| 3.750 | 0.39827      | 0.46837  | 9.125  | 0.39000      | 0.38186  | 14.500 | 0.31513      | 0.31616  |
| 3.875 | 0.39909      | 0.47567  | 9.250  | 0.38669      | 0.37934  | 14.625 | 0.31344      | 0.31579  |
| 4.000 | 0.40169      | 0.48205  | 9.375  | 0.38364      | 0.37691  | 14.750 | 0.31234      | 0.31545  |
| 4.125 | 0.41091      | 0.48751  | 9.500  | 0.38123      | 0.37455  | 14.875 | 0.31127      | 0.31516  |
| 4.250 | 0.42030      | 0.49205  | 9.625  | 0.37929      | 0.37226  | 15.000 | 0.31070      | 0.31490  |
| 4.375 | 0.43606      | 0.49571  | 9.750  | 0.37723      | 0.37003  | 15.125 | 0.31002      | 0.31467  |
| 4.500 | 0.45306      | 0.49848  | 9.875  | 0.37580      | 0.36786  | 15.250 | 0.30957      | 0.31446  |
| 4.625 | 0.47144      | 0.50041  | 10.000 | 0.37443      | 0.36573  | 15.375 | 0.30883      | 0.31427  |
| 4.750 | 0.48966      | 0.50153  | 10.125 | 0.37313      | 0.36366  | 15.500 | 0.30844      | 0.31409  |
| 4.875 | 0.51022      | 0.50188  | 10.250 | 0.37090      | 0.36162  | 15.625 | 0.30775      | 0.31392  |
| 5.000 | 0.53388      | 0.50151  | 10.375 | 0.36807      | 0.35962  | 15.750 | 0.30645      | 0.31375  |
| 5.125 | 0.55551      | 0.50046  | 10.500 | 0.36386      | 0.35765  | 15.875 | 0.30527      | 0.31358  |
| 5.250 | 0.57229      | 0.49880  | 10.625 | 0.35864      | 0.35571  | 16.000 | 0.30411      | 0.31341  |
| 5.375 | 0.58210      | 0.49659  | 10.750 | 0.35238      | 0.35380  | 16.125 | 0.30338      | 0.31324  |
| 5.500 | 0.58534      | 0.49388  | 10.875 | 0.34527      | 0.35192  | 16.250 | 0.30292      | 0.31306  |
| 5.625 | 0.57981      | 0.49073  | 11.000 | 0.33874      | 0.35006  | 16.375 | 0.30317      | 0.31288  |
| 5.750 | 0.56844      | 0.48720  | 11.125 | 0.33268      | 0.34823  | 16.500 | 0.30384      | 0.31270  |
| 5.875 | 0.55134      | 0.48336  | 11.250 | 0.32771      | 0.34643  | 16.625 | 0.30499      | 0.31252  |
| 6.000 | 0.53069      | 0.47925  | 11.375 | 0.32396      | 0.34466  | 16.750 | 0.30654      | 0.31235  |
| 6.125 | 0.50844      | 0.47493  | 11.500 | 0.32124      | 0.34291  | 16.875 | 0.30811      | 0.31219  |
| 6.250 | 0.48523      | 0.47046  | 11.625 | 0.31962      | 0.34120  | 17.000 | 0.31010      | 0.31205  |
| 6.375 | 0.46410      | 0.46586  | 11.750 | 0.31931      | 0.33952  | 17.125 | 0.31220      | 0.31195  |
| 6.500 | 0.44442      | 0.46120  | 11.875 | 0.31980      | 0.33788  | 17.250 | 0.31397      | 0.31189  |
| 6.625 | 0.43003      | 0.45650  | 12.000 | 0.32134      | 0.33628  | 17.375 | 0.31595      | 0.31188  |
| 6.750 | 0.41869      | 0.45180  | 12.125 | 0.32322      | 0.33472  | 17.500 | 0.31793      | 0.31195  |
| 6.875 | 0.41045      | 0.44713  | 12.250 | 0.32582      | 0.33320  | 17.625 | 0.31963      | 0.31210  |
| 7.000 | 0.40445      | 0.44251  | 12.375 | 0.32846      | 0.33174  | 17.750 | 0.32061      | 0.31235  |
| 7.125 | 0.40117      | 0.43797  | 12.500 | 0.33154      | 0.33032  | 17.875 | 0.32197      | 0.31271  |
| 7.250 | 0.39943      | 0.43352  | 12.625 | 0.33435      | 0.32896  | 18.000 | 0.32272      | 0.31320  |
| 7.375 | 0.40001      | 0.42917  | 12.750 | 0.33708      | 0.32766  | 18.125 | 0.32341      | 0.31383  |
| 7.500 | 0.40137      | 0.42495  | 12.875 | 0.33905      | 0.32642  | 18.250 | 0.32408      | 0.31461  |
| 7.625 | 0.40332      | 0.42085  | 13.000 | 0.34065      | 0.32524  | 18.375 | 0.32387      | 0.31555  |
| 7.750 | 0.40545      | 0.41688  | 13.125 | 0.34158      | 0.32413  | 18.500 | 0.32403      | 0.31665  |
| 7.875 | 0.40743      | 0.41305  | 13.250 | 0.34149      | 0.32308  | 18.625 | 0.32416      | 0.31790  |
| 8.000 | 0.40892      | 0.40936  | 13.375 | 0.34051      | 0.32209  | 18.750 | 0.32398      | 0.31930  |
| 8.125 | 0.40967      | 0.40580  | 13.500 | 0.33876      | 0.32118  | 18.875 | 0.32423      | 0.32081  |
| 8.250 | 0.40931      | 0.40238  | 13.625 | 0.33614      | 0.32033  | 19.000 | 0.32466      | 0.32239  |
| 8.375 | 0.40865      | 0.39909  | 13.750 | 0.33308      | 0.31955  |        |              |          |

**Table S3.** The total scattering intensity functions  $I^{tot}(s)$  and the background lines  $I^b(s)$  for tetramazine. Short camera distance (SD=193.3 mm).

The used diffraction pattern no.1

| $s$   | $I^{tot}(s)$ | $I^b(s)$ | $s$   | $I^{tot}(s)$ | $I^b(s)$ | $s$   | $I^{tot}(s)$ | $I^b(s)$ |
|-------|--------------|----------|-------|--------------|----------|-------|--------------|----------|
| 7.00  | 0.23992      | 0.25646  | 15.25 | 0.19391      | 0.19624  | 23.50 | 0.18805      | 0.18812  |
| 7.25  | 0.23919      | 0.25374  | 15.50 | 0.19287      | 0.19539  | 23.75 | 0.18801      | 0.18834  |
| 7.50  | 0.24013      | 0.25156  | 15.75 | 0.19143      | 0.19457  | 24.00 | 0.18796      | 0.18858  |
| 7.75  | 0.24509      | 0.24959  | 16.00 | 0.18984      | 0.19378  | 24.25 | 0.18797      | 0.18886  |
| 8.00  | 0.24753      | 0.24762  | 16.25 | 0.18880      | 0.19302  | 24.50 | 0.18831      | 0.18917  |
| 8.25  | 0.24907      | 0.24555  | 16.50 | 0.18847      | 0.19230  | 24.75 | 0.18884      | 0.18952  |
| 8.50  | 0.24904      | 0.24331  | 16.75 | 0.18904      | 0.19162  | 25.00 | 0.18976      | 0.18991  |
| 8.75  | 0.24595      | 0.24092  | 17.00 | 0.19034      | 0.19099  | 25.25 | 0.19040      | 0.19034  |
| 9.00  | 0.24149      | 0.23839  | 17.25 | 0.19154      | 0.19040  | 25.50 | 0.19134      | 0.19082  |
| 9.25  | 0.23805      | 0.23577  | 17.50 | 0.19240      | 0.18986  | 25.75 | 0.19196      | 0.19134  |
| 9.50  | 0.23562      | 0.23311  | 17.75 | 0.19311      | 0.18936  | 26.00 | 0.19247      | 0.19191  |
| 9.75  | 0.23362      | 0.23044  | 18.00 | 0.19308      | 0.18892  | 26.25 | 0.19312      | 0.19252  |
| 10.00 | 0.23159      | 0.22782  | 18.25 | 0.19245      | 0.18853  | 26.50 | 0.19364      | 0.19318  |
| 10.25 | 0.23027      | 0.22527  | 18.50 | 0.19131      | 0.18818  | 26.75 | 0.19421      | 0.19388  |
| 10.50 | 0.22670      | 0.22282  | 18.75 | 0.18979      | 0.18789  | 27.00 | 0.19471      | 0.19461  |
| 10.75 | 0.22036      | 0.22050  | 19.00 | 0.18808      | 0.18764  | 27.25 | 0.19536      | 0.19539  |
| 11.00 | 0.21357      | 0.21831  | 19.25 | 0.18647      | 0.18743  | 27.50 | 0.19595      | 0.19620  |
| 11.25 | 0.20765      | 0.21626  | 19.50 | 0.18554      | 0.18727  | 27.75 | 0.19655      | 0.19704  |
| 11.50 | 0.20423      | 0.21435  | 19.75 | 0.18500      | 0.18714  | 28.00 | 0.19750      | 0.19790  |
| 11.75 | 0.20300      | 0.21257  | 20.00 | 0.18496      | 0.18705  | 28.25 | 0.19823      | 0.19880  |
| 12.00 | 0.20360      | 0.21092  | 20.25 | 0.18528      | 0.18700  | 28.50 | 0.19923      | 0.19972  |
| 12.25 | 0.20526      | 0.20938  | 20.50 | 0.18566      | 0.18697  | 28.75 | 0.20035      | 0.20067  |
| 12.50 | 0.20827      | 0.20795  | 20.75 | 0.18603      | 0.18697  | 29.00 | 0.20119      | 0.20166  |
| 12.75 | 0.21107      | 0.20661  | 21.00 | 0.18643      | 0.18699  | 29.25 | 0.20256      | 0.20268  |
| 13.00 | 0.21280      | 0.20536  | 21.25 | 0.18695      | 0.18703  | 29.50 | 0.20389      | 0.20375  |
| 13.25 | 0.21298      | 0.20417  | 21.50 | 0.18715      | 0.18708  | 29.75 | 0.20498      | 0.20487  |
| 13.50 | 0.21142      | 0.20304  | 21.75 | 0.18768      | 0.18716  | 30.00 | 0.20650      | 0.20605  |
| 13.75 | 0.20850      | 0.20196  | 22.00 | 0.18800      | 0.18725  | 30.25 | 0.20780      | 0.20730  |
| 14.00 | 0.20452      | 0.20093  | 22.25 | 0.18844      | 0.18735  | 30.50 | 0.20907      | 0.20862  |
| 14.25 | 0.20094      | 0.19993  | 22.50 | 0.18845      | 0.18747  | 30.75 | 0.21048      | 0.21001  |
| 14.50 | 0.19806      | 0.19897  | 22.75 | 0.18847      | 0.18760  | 31.00 | 0.21181      | 0.21145  |
| 14.75 | 0.19624      | 0.19803  | 23.00 | 0.18826      | 0.18776  | 31.25 | 0.21302      | 0.21291  |
| 15.00 | 0.19484      | 0.19712  | 23.25 | 0.18821      | 0.18793  | 31.50 | 0.21426      | 0.21432  |
|       |              |          |       |              |          | 31.75 | 0.21568      | 0.21558  |

The used diffraction pattern no.2

| $s$   | $I^{oi}(s)$ | $I^b(s)$ | $s$   | $I^{oi}(s)$ | $I^b(s)$ | $s$   | $I^{oi}(s)$ | $I^b(s)$ |
|-------|-------------|----------|-------|-------------|----------|-------|-------------|----------|
| 7.00  | 0.27464     | 0.29532  | 15.25 | 0.21629     | 0.21913  | 23.50 | 0.20962     | 0.20985  |
| 7.25  | 0.27191     | 0.29067  | 15.50 | 0.21504     | 0.21812  | 23.75 | 0.20969     | 0.21016  |
| 7.50  | 0.27321     | 0.28722  | 15.75 | 0.21347     | 0.21714  | 24.00 | 0.20960     | 0.21049  |
| 7.75  | 0.27867     | 0.28438  | 16.00 | 0.21144     | 0.21621  | 24.25 | 0.20985     | 0.21087  |
| 8.00  | 0.28154     | 0.28178  | 16.25 | 0.21005     | 0.21531  | 24.50 | 0.21032     | 0.21129  |
| 8.25  | 0.28382     | 0.27918  | 16.50 | 0.20983     | 0.21447  | 24.75 | 0.21100     | 0.21175  |
| 8.50  | 0.28351     | 0.27647  | 16.75 | 0.21032     | 0.21367  | 25.00 | 0.21198     | 0.21226  |
| 8.75  | 0.28014     | 0.27359  | 17.00 | 0.21168     | 0.21292  | 25.25 | 0.21299     | 0.21282  |
| 9.00  | 0.27437     | 0.27057  | 17.25 | 0.21334     | 0.21223  | 25.50 | 0.21395     | 0.21342  |
| 9.25  | 0.26974     | 0.26743  | 17.50 | 0.21447     | 0.21159  | 25.75 | 0.21493     | 0.21407  |
| 9.50  | 0.26707     | 0.26421  | 17.75 | 0.21539     | 0.21101  | 26.00 | 0.21568     | 0.21477  |
| 9.75  | 0.26489     | 0.26098  | 18.00 | 0.21553     | 0.21049  | 26.25 | 0.21642     | 0.21552  |
| 10.00 | 0.26248     | 0.25779  | 18.25 | 0.21488     | 0.21003  | 26.50 | 0.21694     | 0.21630  |
| 10.25 | 0.26100     | 0.25467  | 18.50 | 0.21370     | 0.20963  | 26.75 | 0.21755     | 0.21713  |
| 10.50 | 0.25662     | 0.25167  | 18.75 | 0.21176     | 0.20928  | 27.00 | 0.21814     | 0.21799  |
| 10.75 | 0.24912     | 0.24881  | 19.00 | 0.20969     | 0.20899  | 27.25 | 0.21868     | 0.21888  |
| 11.00 | 0.24061     | 0.24611  | 19.25 | 0.20776     | 0.20875  | 27.50 | 0.21939     | 0.21980  |
| 11.25 | 0.23339     | 0.24358  | 19.50 | 0.20655     | 0.20856  | 27.75 | 0.22023     | 0.22074  |
| 11.50 | 0.22879     | 0.24121  | 19.75 | 0.20588     | 0.20841  | 28.00 | 0.22089     | 0.22171  |
| 11.75 | 0.22698     | 0.23901  | 20.00 | 0.20586     | 0.20831  | 28.25 | 0.22191     | 0.22270  |
| 12.00 | 0.22766     | 0.23697  | 20.25 | 0.20617     | 0.20825  | 28.50 | 0.22299     | 0.22372  |
| 12.25 | 0.22968     | 0.23507  | 20.50 | 0.20656     | 0.20822  | 28.75 | 0.22421     | 0.22477  |
| 12.50 | 0.23325     | 0.23331  | 20.75 | 0.20713     | 0.20822  | 29.00 | 0.22550     | 0.22587  |
| 12.75 | 0.23672     | 0.23166  | 21.00 | 0.20763     | 0.20826  | 29.25 | 0.22705     | 0.22701  |
| 13.00 | 0.23904     | 0.23012  | 21.25 | 0.20803     | 0.20832  | 29.50 | 0.22838     | 0.22822  |
| 13.25 | 0.23962     | 0.22867  | 21.50 | 0.20847     | 0.20840  | 29.75 | 0.22987     | 0.22951  |
| 13.50 | 0.23777     | 0.22729  | 21.75 | 0.20904     | 0.20850  | 30.00 | 0.23141     | 0.23089  |
| 13.75 | 0.23394     | 0.22599  | 22.00 | 0.20961     | 0.20863  | 30.25 | 0.23311     | 0.23236  |
| 14.00 | 0.22940     | 0.22474  | 22.25 | 0.21002     | 0.20877  | 30.50 | 0.23462     | 0.23393  |
| 14.25 | 0.22508     | 0.22353  | 22.50 | 0.21018     | 0.20894  | 30.75 | 0.23604     | 0.23557  |
| 14.50 | 0.22167     | 0.22238  | 22.75 | 0.21018     | 0.20913  | 31.00 | 0.23750     | 0.23725  |
| 14.75 | 0.21912     | 0.22126  | 23.00 | 0.20995     | 0.20934  | 31.25 | 0.23887     | 0.23888  |
| 15.00 | 0.21743     | 0.22017  | 23.25 | 0.20990     | 0.20958  | 31.50 | 0.24025     | 0.24033  |
|       |             |          |       |             |          | 31.75 | 0.24170     | 0.24140  |

**Table S4.** Equilibrium ( $r_e$ ) and thermal-average ( $r_g, r_a$ ) distances, vibrational corrections (see text for the notations), and mean amplitudes ( $u$ ) for internuclear distances of the *meso* form of tetramazine obtained for 359 K at the GED(MP2) refinement (in Å).  
( $n$  - number of equivalent parameters)

| Atomic pair | $n$ | $r_e$  | $r_g$  | $r_a$  | $\Delta r$ | $\Delta r(\text{har})$ | $\Delta r(\text{kin})$ | $\Delta r(\text{dyn})$ | $\Delta r(\text{rot})$ | $u$    |
|-------------|-----|--------|--------|--------|------------|------------------------|------------------------|------------------------|------------------------|--------|
| N6H8        | 2   | 1.0173 | 1.0388 | 1.0338 | 0.0215     | 0.0254                 | -0.0213                | 0.0174                 | 0.0000                 | 0.0732 |
| C10H15      | 2   | 1.0789 | 1.1033 | 1.1025 | 0.0244     | 0.0650                 | -0.0569                | 0.0163                 | 0.0000                 | 0.0519 |
| C9H11       | 2   | 1.0829 | 1.1069 | 1.1032 | 0.0240     | 0.0472                 | -0.0420                | 0.0188                 | 0.0000                 | 0.0662 |
| C1H3        | 2   | 1.0839 | 1.1078 | 1.1033 | 0.0239     | 0.0361                 | -0.0312                | 0.0191                 | -0.0001                | 0.0721 |
| C10H16      | 2   | 1.0843 | 1.1093 | 1.1081 | 0.0250     | 0.0654                 | -0.0574                | 0.0169                 | 0.0001                 | 0.0455 |
| C9H13       | 2   | 1.0847 | 1.1078 | 1.1048 | 0.0231     | 0.0560                 | -0.0499                | 0.0170                 | 0.0000                 | 0.0605 |
| C9H12       | 2   | 1.0852 | 1.1082 | 1.1052 | 0.0230     | 0.0545                 | -0.0485                | 0.0169                 | 0.0001                 | 0.0598 |
| C10H14      | 2   | 1.0853 | 1.1105 | 1.1101 | 0.0252     | 0.0701                 | -0.0611                | 0.0163                 | -0.0001                | 0.0435 |
| C1H4        | 2   | 1.0863 | 1.1095 | 1.1052 | 0.0232     | 0.0380                 | -0.0326                | 0.0179                 | -0.0001                | 0.0713 |
| N5C7        | 2   | 1.4259 | 1.4356 | 1.4338 | 0.0097     | 0.0088                 | -0.0088                | 0.0096                 | 0.0001                 | 0.0505 |
| N6C7        | 2   | 1.4389 | 1.4482 | 1.4465 | 0.0094     | 0.0116                 | -0.0098                | 0.0076                 | 0.0000                 | 0.0512 |
| C1N5        | 2   | 1.4390 | 1.4512 | 1.4495 | 0.0122     | 0.0126                 | -0.0101                | 0.0098                 | -0.0001                | 0.0511 |
| N5N6        | 2   | 1.5143 | 1.5264 | 1.5244 | 0.0122     | 0.0150                 | -0.0091                | 0.0063                 | 0.0000                 | 0.0578 |
| C7C9        | 2   | 1.5181 | 1.5315 | 1.5300 | 0.0134     | 0.0198                 | -0.0180                | 0.0116                 | 0.0000                 | 0.0503 |
| C7C10       | 2   | 1.5186 | 1.5319 | 1.5302 | 0.0132     | 0.0129                 | -0.0112                | 0.0116                 | -0.0001                | 0.0506 |
| C1C2        | 1   | 1.5300 | 1.5424 | 1.5412 | 0.0124     | 0.0217                 | -0.0199                | 0.0106                 | 0.0000                 | 0.0433 |
| H15H16      | 2   | 1.7571 | 1.7874 | 1.7876 | 0.0303     | 0.1102                 | -0.1018                | 0.0218                 | 0.0001                 | 0.0601 |
| H14H16      | 2   | 1.7607 | 1.7951 | 1.7946 | 0.0343     | 0.1122                 | -0.1049                | 0.0271                 | -0.0001                | 0.0676 |
| H12H13      | 2   | 1.7640 | 1.7939 | 1.7890 | 0.0299     | 0.0885                 | -0.0854                | 0.0267                 | 0.0001                 | 0.0979 |
| H11H13      | 2   | 1.7652 | 1.7966 | 1.7915 | 0.0314     | 0.0811                 | -0.0784                | 0.0287                 | 0.0000                 | 0.0970 |
| H3H4        | 2   | 1.7694 | 1.7969 | 1.7898 | 0.0275     | 0.0555                 | -0.0508                | 0.0228                 | 0.0000                 | 0.1141 |
| H14H15      | 2   | 1.7723 | 1.8040 | 1.8042 | 0.0317     | 0.1094                 | -0.1011                | 0.0235                 | -0.0001                | 0.0618 |
| H11H12      | 2   | 1.7772 | 1.8061 | 1.8009 | 0.0289     | 0.0778                 | -0.0752                | 0.0263                 | 0.0000                 | 0.0970 |
| C7H8        | 2   | 2.0012 | 2.0200 | 2.0149 | 0.0188     | 0.0215                 | -0.0390                | 0.0363                 | 0.0000                 | 0.1024 |
| N5H8        | 2   | 2.0119 | 2.0320 | 2.0266 | 0.0201     | 0.0270                 | -0.0535                | 0.0465                 | 0.0001                 | 0.1064 |
| H4N5        | 2   | 2.0559 | 2.0782 | 2.0730 | 0.0223     | 0.0334                 | -0.0334                | 0.0223                 | 0.0000                 | 0.1060 |
| H3H15       | 2   | 2.0835 | 2.2076 | 2.1825 | 0.1241     | 0.0545                 | 0.0289                 | 0.0408                 | -0.0001                | 0.2382 |
| H3N5        | 2   | 2.1200 | 2.1428 | 2.1383 | 0.0228     | 0.0315                 | -0.0322                | 0.0234                 | 0.0001                 | 0.1001 |
| C7H16       | 2   | 2.1284 | 2.1541 | 2.1489 | 0.0257     | 0.0381                 | -0.0386                | 0.0261                 | 0.0001                 | 0.1065 |
| C7H11       | 2   | 2.1341 | 2.1609 | 2.1560 | 0.0268     | 0.0414                 | -0.0435                | 0.0290                 | -0.0001                | 0.1075 |
| C7H14       | 2   | 2.1439 | 2.1667 | 2.1624 | 0.0228     | 0.0500                 | -0.0501                | 0.0230                 | -0.0001                | 0.1001 |
| C7H13       | 2   | 2.1442 | 2.1653 | 2.1607 | 0.0212     | 0.0470                 | -0.0472                | 0.0214                 | 0.0000                 | 0.1036 |
| C7H12       | 2   | 2.1465 | 2.1688 | 2.1642 | 0.0223     | 0.0480                 | -0.0500                | 0.0243                 | 0.0000                 | 0.1044 |
| C1H17       | 2   | 2.1474 | 2.1735 | 2.1693 | 0.0262     | 0.0444                 | -0.0455                | 0.0273                 | 0.0000                 | 0.0960 |
| C1H18       | 2   | 2.1507 | 2.1743 | 2.1699 | 0.0235     | 0.0443                 | -0.0463                | 0.0255                 | 0.0000                 | 0.0972 |
| C7H15       | 2   | 2.1602 | 2.1855 | 2.1810 | 0.0254     | 0.0442                 | -0.0465                | 0.0277                 | 0.0000                 | 0.1061 |
| H8H11       | 2   | 2.3402 | 2.3531 | 2.3310 | 0.0129     | 0.0391                 | -0.0386                | 0.0124                 | 0.0000                 | 0.2296 |
| C1N19       | 2   | 2.3880 | 2.4066 | 2.4044 | 0.0186     | 0.0161                 | -0.0158                | 0.0183                 | 0.0000                 | 0.0730 |
| C1N6        | 2   | 2.4166 | 2.4411 | 2.4389 | 0.0245     | 0.0198                 | -0.0264                | 0.0310                 | 0.0001                 | 0.0745 |
| C1C7        | 2   | 2.4560 | 2.4742 | 2.4724 | 0.0182     | 0.0152                 | -0.0221                | 0.0251                 | 0.0000                 | 0.0683 |
| H3H18       | 2   | 2.4738 | 2.5114 | 2.4997 | 0.0376     | 0.0574                 | -0.0591                | 0.0393                 | 0.0000                 | 0.1660 |
| N5C9        | 2   | 2.4792 | 2.4936 | 2.4918 | 0.0145     | 0.0214                 | -0.0243                | 0.0173                 | 0.0001                 | 0.0697 |
| H12H16      | 2   | 2.4832 | 2.5318 | 2.5065 | 0.0486     | 0.0671                 | -0.0151                | -0.0034                | 0.0000                 | 0.2568 |
| H3N6        | 2   | 2.4935 | 2.5225 | 2.5118 | 0.0290     | 0.0344                 | -0.0349                | 0.0295                 | 0.0000                 | 0.1629 |
| C9C10       | 2   | 2.5062 | 2.5235 | 2.5216 | 0.0173     | 0.0275                 | -0.0247                | 0.0144                 | 0.0001                 | 0.0739 |
| N6C10       | 2   | 2.5248 | 2.5395 | 2.5375 | 0.0147     | 0.0150                 | -0.0179                | 0.0176                 | 0.0000                 | 0.0719 |
| H8C9        | 2   | 2.5323 | 2.5575 | 2.5486 | 0.0252     | 0.0227                 | -0.0434                | 0.0460                 | -0.0001                | 0.1503 |
| N5H11       | 2   | 2.5518 | 2.6064 | 2.5961 | 0.0546     | 0.0395                 | -0.0342                | 0.0493                 | 0.0000                 | 0.1657 |
| N6C9        | 2   | 2.5552 | 2.5741 | 2.5723 | 0.0190     | 0.0225                 | -0.0246                | 0.0211                 | 0.0000                 | 0.0717 |
| H13H14      | 2   | 2.5763 | 2.6527 | 2.6240 | 0.0764     | 0.0686                 | 0.0054                 | 0.0024                 | 0.0000                 | 0.2752 |
| N5C10       | 2   | 2.5910 | 2.6085 | 2.6067 | 0.0175     | 0.0116                 | -0.0154                | 0.0213                 | 0.0000                 | 0.0685 |
| H3N19       | 2   | 2.5930 | 2.6245 | 2.6136 | 0.0315     | 0.0370                 | -0.0329                | 0.0275                 | -0.0001                | 0.1512 |
| N6H15       | 2   | 2.6409 | 2.6865 | 2.6750 | 0.0456     | 0.0354                 | -0.0343                | 0.0445                 | 0.0000                 | 0.1738 |

|        |   |        |        |        |         |        |         |         |         |        |
|--------|---|--------|--------|--------|---------|--------|---------|---------|---------|--------|
| H3C7   | 2 | 2.6472 | 2.6955 | 2.6878 | 0.0482  | 0.0337 | -0.0383 | 0.0528  | 0.0000  | 0.1457 |
| H4N19  | 2 | 2.6479 | 2.6752 | 2.6636 | 0.0274  | 0.0342 | -0.0333 | 0.0265  | 0.0000  | 0.1413 |
| C9H16  | 2 | 2.6530 | 2.7041 | 2.6918 | 0.0511  | 0.0407 | -0.0420 | 0.0524  | 0.0000  | 0.1849 |
| H3C10  | 2 | 2.6687 | 2.7435 | 2.7292 | 0.0748  | 0.0300 | -0.0305 | 0.0753  | 0.0000  | 0.1982 |
| C10H13 | 2 | 2.7114 | 2.7693 | 2.7578 | 0.0579  | 0.0459 | -0.0396 | 0.0516  | 0.0000  | 0.1819 |
| N6H11  | 2 | 2.7228 | 2.7390 | 2.7307 | 0.0162  | 0.0396 | -0.0310 | 0.0076  | 0.0000  | 0.1569 |
| C1H15  | 2 | 2.7334 | 2.7797 | 2.7639 | 0.0463  | 0.0267 | 0.0079  | 0.0116  | 0.0001  | 0.2100 |
| C10H12 | 2 | 2.7790 | 2.7724 | 2.7622 | -0.0066 | 0.0506 | -0.0398 | -0.0174 | 0.0000  | 0.1722 |
| C9H14  | 2 | 2.8075 | 2.8196 | 2.8050 | 0.0121  | 0.0498 | -0.0246 | -0.0130 | -0.0001 | 0.2031 |
| N5H15  | 2 | 2.8412 | 2.8723 | 2.8642 | 0.0310  | 0.0323 | -0.0151 | 0.0139  | -0.0001 | 0.1557 |
| H8H12  | 2 | 2.8646 | 2.9421 | 2.9157 | 0.0775  | 0.0319 | -0.0534 | 0.0990  | 0.0000  | 0.2747 |
| H4C7   | 2 | 2.9066 | 2.9043 | 2.8960 | -0.0023 | 0.0294 | -0.0314 | -0.0003 | 0.0000  | 0.1560 |
| H13H16 | 2 | 2.9073 | 3.0105 | 2.9719 | 0.1032  | 0.0497 | -0.0821 | 0.1357  | -0.0001 | 0.3406 |
| H4N20  | 2 | 2.9200 | 3.0224 | 2.9963 | 0.1024  | 0.0411 | -0.0418 | 0.1031  | 0.0000  | 0.2584 |
| C1C10  | 2 | 2.9420 | 2.9673 | 2.9634 | 0.0253  | 0.0120 | -0.0248 | 0.0381  | 0.0000  | 0.1073 |
| N6H12  | 2 | 2.9688 | 3.0235 | 3.0117 | 0.0548  | 0.0376 | -0.0502 | 0.0673  | 0.0001  | 0.1891 |
| N5H13  | 2 | 2.9791 | 2.9630 | 2.9524 | -0.0161 | 0.0380 | -0.0426 | -0.0115 | 0.0000  | 0.1767 |
| N5H14  | 2 | 2.9869 | 3.0213 | 3.0104 | 0.0344  | 0.0347 | -0.0559 | 0.0555  | 0.0001  | 0.1803 |
| H4H14  | 2 | 3.0064 | 3.0251 | 2.9702 | 0.0187  | 0.0309 | -0.0410 | 0.0287  | 0.0001  | 0.3985 |
| N6H16  | 2 | 3.0240 | 3.0313 | 3.0184 | 0.0073  | 0.0269 | -0.0202 | 0.0007  | -0.0001 | 0.1950 |
| H3H17  | 1 | 3.0382 | 3.0694 | 3.0658 | 0.0311  | 0.0609 | -0.0766 | 0.0468  | 0.0000  | 0.1049 |
| H4H18  | 1 | 3.0447 | 3.0712 | 3.0678 | 0.0265  | 0.0616 | -0.0787 | 0.0435  | 0.0001  | 0.1032 |
| H3H14  | 2 | 3.0609 | 3.1447 | 3.0949 | 0.0838  | 0.0380 | -0.0912 | 0.1371  | -0.0001 | 0.3780 |
| H4H15  | 2 | 3.0693 | 3.0463 | 2.9982 | -0.0230 | 0.0255 | 0.0051  | -0.0536 | 0.0000  | 0.3699 |
| H4C10  | 2 | 3.1542 | 3.1367 | 3.1155 | -0.0176 | 0.0195 | -0.0244 | -0.0127 | 0.0000  | 0.2530 |
| C1H8   | 2 | 3.1687 | 3.1973 | 3.1938 | 0.0286  | 0.0313 | -0.0622 | 0.0595  | 0.0000  | 0.1085 |
| C1H14  | 2 | 3.1774 | 3.2199 | 3.1916 | 0.0424  | 0.0252 | -0.0688 | 0.0861  | -0.0001 | 0.2957 |
| C1N20  | 2 | 3.1791 | 3.2416 | 3.2330 | 0.0625  | 0.0188 | -0.0361 | 0.0798  | 0.0000  | 0.1666 |
| H12H14 | 2 | 3.2338 | 3.1792 | 3.1424 | -0.0546 | 0.0619 | -0.0438 | -0.0726 | -0.0001 | 0.3340 |
| H4H22  | 2 | 3.2859 | 3.3844 | 3.3565 | 0.0985  | 0.0511 | -0.0521 | 0.0996  | -0.0001 | 0.2652 |
| H4N6   | 2 | 3.2993 | 3.3092 | 3.3058 | 0.0100  | 0.0327 | -0.0488 | 0.0260  | 0.0001  | 0.1118 |
| H8C10  | 2 | 3.3155 | 3.3379 | 3.3346 | 0.0223  | 0.0251 | -0.0397 | 0.0369  | 0.0000  | 0.1056 |
| N5H12  | 2 | 3.3449 | 3.3715 | 3.3678 | 0.0266  | 0.0417 | -0.0640 | 0.0488  | 0.0001  | 0.1146 |
| N6H14  | 2 | 3.3766 | 3.3903 | 3.3871 | 0.0137  | 0.0431 | -0.0729 | 0.0435  | 0.0000  | 0.1066 |
| H3H8   | 2 | 3.4313 | 3.4570 | 3.4480 | 0.0257  | 0.0418 | -0.0645 | 0.0484  | 0.0000  | 0.1767 |
| N6H13  | 2 | 3.4325 | 3.4383 | 3.4357 | 0.0058  | 0.0434 | -0.0607 | 0.0232  | -0.0001 | 0.1015 |
| C10H11 | 2 | 3.4362 | 3.4573 | 3.4546 | 0.0211  | 0.0419 | -0.0593 | 0.0385  | 0.0000  | 0.1021 |
| N5H16  | 2 | 3.4449 | 3.4557 | 3.4526 | 0.0109  | 0.0301 | -0.0504 | 0.0312  | 0.0000  | 0.1052 |
| C9H15  | 2 | 3.4461 | 3.4603 | 3.4581 | 0.0142  | 0.0513 | -0.0755 | 0.0384  | 0.0000  | 0.1002 |
| H8H13  | 2 | 3.5373 | 3.5377 | 3.5305 | 0.0003  | 0.0438 | -0.0904 | 0.0470  | -0.0001 | 0.1621 |
| H8H15  | 2 | 3.5959 | 3.6420 | 3.6325 | 0.0461  | 0.0429 | -0.0604 | 0.0636  | 0.0000  | 0.1853 |
| H3N20  | 2 | 3.6296 | 3.6908 | 3.6725 | 0.0612  | 0.0266 | -0.0531 | 0.0877  | 0.0000  | 0.2379 |
| H3H16  | 2 | 3.6333 | 3.6766 | 3.6638 | 0.0433  | 0.0453 | -0.0650 | 0.0629  | 0.0001  | 0.2183 |
| N5N19  | 1 | 3.6339 | 3.6476 | 3.6461 | 0.0136  | 0.0067 | -0.0205 | 0.0274  | 0.0000  | 0.0724 |
| H8H16  | 2 | 3.6539 | 3.6762 | 3.6639 | 0.0224  | 0.0315 | -0.0241 | 0.0149  | 0.0001  | 0.2110 |
| C1H22  | 2 | 3.6656 | 3.7301 | 3.7195 | 0.0645  | 0.0290 | -0.0616 | 0.0971  | 0.0000  | 0.1982 |
| H11H16 | 2 | 3.6737 | 3.6979 | 3.6897 | 0.0241  | 0.0483 | -0.0748 | 0.0506  | 0.0000  | 0.1776 |
| C1C21  | 2 | 3.6934 | 3.7185 | 3.7166 | 0.0251  | 0.0120 | -0.0328 | 0.0459  | 0.0000  | 0.0825 |
| H12H15 | 2 | 3.7129 | 3.7137 | 3.7046 | 0.0008  | 0.0676 | -0.1011 | 0.0343  | 0.0000  | 0.1886 |
| H13H15 | 2 | 3.7427 | 3.7721 | 3.7645 | 0.0294  | 0.0635 | -0.0870 | 0.0529  | 0.0000  | 0.1807 |
| C1C9   | 2 | 3.7492 | 3.7676 | 3.7661 | 0.0184  | 0.0272 | -0.0345 | 0.0257  | 0.0000  | 0.0791 |
| H11H14 | 2 | 3.7506 | 3.7840 | 3.7732 | 0.0334  | 0.0582 | -0.0659 | 0.0411  | 0.0000  | 0.2026 |
| H4C21  | 2 | 3.8326 | 3.8847 | 3.8743 | 0.0520  | 0.0255 | -0.0493 | 0.0758  | 0.0000  | 0.1790 |
| H3H22  | 2 | 3.8921 | 3.9631 | 3.9369 | 0.0709  | 0.0354 | -0.0778 | 0.1134  | -0.0001 | 0.2943 |
| C1H11  | 2 | 3.9615 | 4.0179 | 4.0107 | 0.0564  | 0.0403 | -0.0451 | 0.0612  | 0.0000  | 0.1721 |
| C1H16  | 2 | 3.9692 | 3.9737 | 3.9698 | 0.0045  | 0.0302 | -0.0689 | 0.0432  | 0.0000  | 0.1255 |
| H4C9   | 2 | 4.0004 | 4.0022 | 3.9953 | 0.0018  | 0.0385 | -0.0357 | -0.0010 | 0.0000  | 0.1664 |
| H3C21  | 2 | 4.0137 | 4.0312 | 4.0242 | 0.0175  | 0.0226 | -0.0437 | 0.0385  | 0.0001  | 0.1515 |
| H4H13  | 2 | 4.0158 | 3.9955 | 3.9767 | -0.0203 | 0.0491 | -0.0197 | -0.0497 | 0.0000  | 0.2701 |
| H4H8   | 2 | 4.0181 | 4.0392 | 4.0351 | 0.0211  | 0.0412 | -0.0886 | 0.0685  | 0.0000  | 0.1342 |



|        |   |        |        |        |         |        |         |         |         |        |
|--------|---|--------|--------|--------|---------|--------|---------|---------|---------|--------|
| C1H13  | 2 | 4.0571 | 4.0479 | 4.0385 | -0.0092 | 0.0383 | -0.0395 | -0.0080 | 0.0000  | 0.1942 |
| C1H29  | 2 | 4.1134 | 4.1781 | 4.1681 | 0.0647  | 0.0193 | -0.0135 | 0.0589  | 0.0000  | 0.2062 |
| H8H14  | 2 | 4.1227 | 4.1386 | 4.1348 | 0.0159  | 0.0481 | -0.0919 | 0.0598  | -0.0001 | 0.1308 |
| H3C9   | 2 | 4.1237 | 4.1704 | 4.1656 | 0.0467  | 0.0416 | -0.0562 | 0.0613  | 0.0000  | 0.1459 |
| H4H16  | 2 | 4.2352 | 4.1956 | 4.1797 | -0.0396 | 0.0356 | -0.0815 | 0.0064  | -0.0001 | 0.2545 |
| H11H15 | 2 | 4.2666 | 4.2879 | 4.2843 | 0.0213  | 0.0625 | -0.0979 | 0.0566  | 0.0001  | 0.1368 |
| H4H11  | 2 | 4.2772 | 4.3405 | 4.3279 | 0.0633  | 0.0496 | -0.0548 | 0.0685  | 0.0000  | 0.2323 |
| H4H29  | 2 | 4.2937 | 4.4041 | 4.3843 | 0.1104  | 0.0306 | -0.0359 | 0.1157  | 0.0000  | 0.2929 |
| N5N20  | 2 | 4.3687 | 4.4168 | 4.4100 | 0.0481  | 0.0082 | -0.0427 | 0.0826  | 0.0000  | 0.1378 |
| C1C24  | 2 | 4.4067 | 4.4350 | 4.4323 | 0.0283  | 0.0082 | -0.0446 | 0.0646  | 0.0001  | 0.1100 |
| H3H13  | 2 | 4.4897 | 4.5297 | 4.5193 | 0.0399  | 0.0519 | -0.0671 | 0.0551  | 0.0000  | 0.2174 |
| H3H11  | 2 | 4.5273 | 4.5854 | 4.5786 | 0.0581  | 0.0520 | -0.0733 | 0.0794  | 0.0000  | 0.1823 |
| C1H12  | 2 | 4.5771 | 4.5972 | 4.5948 | 0.0200  | 0.0438 | -0.0737 | 0.0499  | 0.0000  | 0.1109 |
| H3H25  | 2 | 4.6457 | 4.7125 | 4.6938 | 0.0669  | 0.0445 | -0.0214 | 0.0438  | 0.0000  | 0.2759 |
| H4C24  | 2 | 4.6465 | 4.7080 | 4.6978 | 0.0615  | 0.0188 | -0.0639 | 0.1066  | 0.0000  | 0.2163 |
| N5H29  | 2 | 4.6638 | 4.7386 | 4.7252 | 0.0748  | 0.0183 | -0.0028 | 0.0593  | 0.0000  | 0.2454 |
| C1H28  | 2 | 4.7049 | 4.7276 | 4.7087 | 0.0227  | 0.0155 | -0.0870 | 0.0942  | 0.0000  | 0.2951 |
| H3H12  | 2 | 4.7672 | 4.8173 | 4.8106 | 0.0501  | 0.0571 | -0.0841 | 0.0771  | 0.0000  | 0.1846 |
| C1H25  | 2 | 4.7896 | 4.8436 | 4.8353 | 0.0540  | 0.0319 | -0.0316 | 0.0537  | 0.0000  | 0.2020 |
| N5C21  | 2 | 4.8033 | 4.8235 | 4.8217 | 0.0201  | 0.0046 | -0.0385 | 0.0540  | 0.0000  | 0.0895 |
| H3H29  | 2 | 4.8472 | 4.8806 | 4.8706 | 0.0334  | 0.0216 | -0.0403 | 0.0520  | 0.0001  | 0.2203 |
| C1C23  | 2 | 4.8643 | 4.8772 | 4.8752 | 0.0129  | 0.0191 | -0.0384 | 0.0322  | 0.0000  | 0.0986 |
| H4H25  | 2 | 4.8789 | 4.9321 | 4.9154 | 0.0532  | 0.0399 | -0.0411 | 0.0543  | 0.0001  | 0.2406 |
| H4H12  | 2 | 4.9149 | 4.8928 | 4.8859 | -0.0222 | 0.0522 | -0.0770 | 0.0027  | -0.0001 | 0.1866 |
| H3C23  | 2 | 4.9151 | 4.9191 | 4.9101 | 0.0040  | 0.0289 | -0.0377 | 0.0129  | -0.0001 | 0.1909 |
| H3C24  | 2 | 4.9393 | 4.9475 | 4.9427 | 0.0081  | 0.0143 | -0.0585 | 0.0524  | -0.0001 | 0.1486 |
| N5H22  | 2 | 4.9862 | 5.0304 | 5.0223 | 0.0442  | 0.0130 | -0.0676 | 0.0988  | 0.0000  | 0.1746 |
| H4C23  | 2 | 5.0179 | 5.0527 | 5.0435 | 0.0348  | 0.0274 | -0.0554 | 0.0628  | 0.0000  | 0.1714 |
| H3H28  | 2 | 5.1292 | 5.1335 | 5.1140 | 0.0044  | 0.0219 | -0.0878 | 0.0702  | 0.0001  | 0.3134 |
| H4H28  | 2 | 5.1632 | 5.2021 | 5.1843 | 0.0390  | 0.0236 | -0.1180 | 0.1333  | 0.0001  | 0.3010 |
| N5C24  | 2 | 5.1762 | 5.2074 | 5.2027 | 0.0311  | 0.0056 | -0.0486 | 0.0741  | 0.0000  | 0.1540 |
| H3H27  | 2 | 5.2505 | 5.1767 | 5.1551 | -0.0738 | 0.0331 | -0.0379 | -0.0690 | 0.0000  | 0.3221 |
| C1H27  | 2 | 5.2745 | 5.2263 | 5.2161 | -0.0482 | 0.0246 | -0.0452 | -0.0276 | 0.0000  | 0.2291 |
| N5H28  | 2 | 5.3612 | 5.3925 | 5.3675 | 0.0313  | 0.0109 | -0.0901 | 0.1105  | 0.0000  | 0.3596 |
| C1H30  | 2 | 5.3822 | 5.3926 | 5.3886 | 0.0104  | 0.0215 | -0.0813 | 0.0701  | 0.0001  | 0.1473 |
| N6N20  | 1 | 5.4362 | 5.4998 | 5.4930 | 0.0636  | 0.0057 | -0.0601 | 0.1180  | 0.0000  | 0.1951 |
| H4H30  | 2 | 5.5001 | 5.5506 | 5.5365 | 0.0505  | 0.0306 | -0.0855 | 0.1054  | 0.0000  | 0.2767 |
| N6H29  | 2 | 5.5698 | 5.6531 | 5.6361 | 0.0833  | 0.0155 | -0.0164 | 0.0842  | 0.0000  | 0.3012 |
| N6C21  | 2 | 5.5864 | 5.6316 | 5.6268 | 0.0452  | 0.0052 | -0.0554 | 0.0954  | 0.0000  | 0.1432 |
| H4H27  | 2 | 5.6230 | 5.5916 | 5.5795 | -0.0314 | 0.0298 | -0.0754 | 0.0142  | 0.0000  | 0.2381 |
| H8H29  | 2 | 5.7094 | 5.7950 | 5.7702 | 0.0856  | 0.0218 | -0.0367 | 0.1005  | 0.0000  | 0.3632 |
| C1H26  | 2 | 5.7096 | 5.7442 | 5.7407 | 0.0345  | 0.0318 | -0.0820 | 0.0848  | -0.0001 | 0.1421 |
| H4H26  | 2 | 5.7322 | 5.8113 | 5.7980 | 0.0791  | 0.0397 | -0.0927 | 0.1321  | 0.0000  | 0.2384 |
| H3H26  | 2 | 5.8540 | 5.8752 | 5.8664 | 0.0212  | 0.0380 | -0.0864 | 0.0696  | 0.0000  | 0.2113 |
| N6H28  | 2 | 5.8683 | 5.9435 | 5.9170 | 0.0752  | 0.0152 | -0.0904 | 0.1504  | 0.0000  | 0.3837 |
| H3H30  | 2 | 5.9133 | 5.9053 | 5.9002 | -0.0080 | 0.0246 | -0.0974 | 0.0648  | 0.0000  | 0.1662 |
| N6C24  | 2 | 5.9418 | 5.9983 | 5.9917 | 0.0565  | 0.0072 | -0.0626 | 0.1119  | 0.0000  | 0.1971 |
| N6H22  | 2 | 6.0040 | 6.0609 | 6.0526 | 0.0569  | 0.0086 | -0.0915 | 0.1398  | 0.0000  | 0.2196 |
| H8H28  | 2 | 6.0309 | 6.1095 | 6.0742 | 0.0786  | 0.0194 | -0.1064 | 0.1656  | 0.0000  | 0.4474 |
| C7H22  | 2 | 6.0667 | 6.1073 | 6.0997 | 0.0406  | 0.0081 | -0.0807 | 0.1132  | 0.0000  | 0.2025 |
| N5C23  | 2 | 6.0831 | 6.0863 | 6.0849 | 0.0033  | 0.0076 | -0.0457 | 0.0413  | 0.0001  | 0.0923 |
| C7C21  | 1 | 6.0831 | 6.1065 | 6.1051 | 0.0234  | 0.0027 | -0.0527 | 0.0734  | 0.0000  | 0.0922 |
| C7H29  | 2 | 6.0874 | 6.1593 | 6.1489 | 0.0718  | 0.0142 | -0.0129 | 0.0706  | -0.0001 | 0.2464 |
| N5H25  | 2 | 6.1282 | 6.1683 | 6.1621 | 0.0401  | 0.0155 | -0.0432 | 0.0678  | 0.0000  | 0.1943 |
| H8C24  | 2 | 6.1821 | 6.2380 | 6.2258 | 0.0559  | 0.0118 | -0.0858 | 0.1298  | 0.0001  | 0.2743 |
| N5H30  | 2 | 6.1878 | 6.1909 | 6.1853 | 0.0031  | 0.0154 | -0.0904 | 0.0780  | 0.0001  | 0.1795 |
| N5H27  | 2 | 6.3904 | 6.3416 | 6.3324 | -0.0488 | 0.0131 | -0.0460 | -0.0160 | 0.0001  | 0.2248 |
| H11H29 | 2 | 6.5176 | 6.6406 | 6.6190 | 0.1230  | 0.0309 | 0.0129  | 0.0792  | 0.0000  | 0.3607 |
| C7C24  | 2 | 6.5651 | 6.5992 | 6.5957 | 0.0341  | 0.0041 | -0.0605 | 0.0905  | 0.0000  | 0.1503 |
| H8H22  | 1 | 6.6794 | 6.7270 | 6.7193 | 0.0476  | 0.0091 | -0.1221 | 0.1606  | 0.0000  | 0.2278 |

|        |   |         |         |         |         |        |         |         |         |        |
|--------|---|---------|---------|---------|---------|--------|---------|---------|---------|--------|
| N6C23  | 2 | 6.6929  | 6.7161  | 6.7095  | 0.0232  | 0.0068 | -0.0600 | 0.0764  | 0.0000  | 0.1158 |
| N6H25  | 2 | 6.6952  | 6.7666  | 6.7525  | 0.0714  | 0.0120 | -0.0588 | 0.1183  | -0.0001 | 0.2263 |
| C7H28  | 2 | 6.7058  | 6.7474  | 6.7275  | 0.0416  | 0.0092 | -0.0993 | 0.1316  | 0.0001  | 0.3588 |
| N6H27  | 2 | 6.7900  | 6.7611  | 6.7436  | -0.0289 | 0.0128 | -0.0498 | 0.0081  | 0.0000  | 0.2394 |
| H15H29 | 1 | 6.8148  | 6.9022  | 6.8906  | 0.0874  | 0.0148 | -0.0055 | 0.0781  | 0.0000  | 0.2834 |
| N5H26  | 2 | 6.9134  | 6.9282  | 6.9259  | 0.0149  | 0.0182 | -0.0887 | 0.0854  | 0.0000  | 0.1282 |
| C9H29  | 2 | 6.9204  | 6.9878  | 6.9758  | 0.0673  | 0.0212 | -0.0086 | 0.0547  | 0.0000  | 0.2742 |
| C10H29 | 2 | 6.9972  | 7.0683  | 7.0611  | 0.0711  | 0.0103 | -0.0302 | 0.0911  | -0.0001 | 0.2253 |
| N6H30  | 2 | 7.0131  | 7.0361  | 7.0300  | 0.0230  | 0.0142 | -0.1138 | 0.1225  | 0.0001  | 0.2059 |
| H14H29 | 2 | 7.1513  | 7.2360  | 7.2196  | 0.0847  | 0.0175 | -0.0633 | 0.1305  | 0.0000  | 0.3417 |
| C7H25  | 2 | 7.1702  | 7.2183  | 7.2110  | 0.0482  | 0.0104 | -0.0533 | 0.0911  | 0.0000  | 0.2226 |
| H13H29 | 2 | 7.2334  | 7.2331  | 7.2151  | -0.0003 | 0.0266 | -0.0106 | -0.0163 | 0.0000  | 0.3458 |
| H8C23  | 2 | 7.2417  | 7.2569  | 7.2477  | 0.0152  | 0.0061 | -0.0826 | 0.0918  | -0.0001 | 0.1782 |
| H8H30  | 2 | 7.2463  | 7.2638  | 7.2523  | 0.0175  | 0.0165 | -0.1401 | 0.1411  | 0.0000  | 0.2860 |
| C10H25 | 2 | 7.2498  | 7.3181  | 7.3057  | 0.0683  | 0.0154 | -0.0504 | 0.1032  | 0.0001  | 0.2973 |
| C7C23  | 2 | 7.2626  | 7.2693  | 7.2675  | 0.0068  | 0.0045 | -0.0597 | 0.0620  | 0.0000  | 0.1052 |
| H8H27  | 2 | 7.2735  | 7.2455  | 7.2240  | -0.0280 | 0.0115 | -0.0648 | 0.0253  | 0.0000  | 0.2732 |
| C10C24 | 1 | 7.3354  | 7.3753  | 7.3724  | 0.0399  | 0.0032 | -0.0693 | 0.1060  | 0.0000  | 0.1446 |
| H8H25  | 2 | 7.3684  | 7.4280  | 7.4135  | 0.0596  | 0.0098 | -0.0858 | 0.1356  | 0.0000  | 0.2455 |
| H11H28 | 2 | 7.3796  | 7.4481  | 7.4180  | 0.0685  | 0.0190 | -0.0922 | 0.1418  | -0.0001 | 0.4626 |
| C10H28 | 2 | 7.5358  | 7.5812  | 7.5670  | 0.0455  | 0.0084 | -0.1062 | 0.1433  | 0.0000  | 0.3254 |
| C7H27  | 2 | 7.5508  | 7.5003  | 7.4910  | -0.0505 | 0.0093 | -0.0586 | -0.0012 | 0.0000  | 0.2355 |
| C9C24  | 2 | 7.5611  | 7.5831  | 7.5780  | 0.0220  | 0.0083 | -0.0652 | 0.0790  | -0.0001 | 0.1930 |
| C7H30  | 2 | 7.5845  | 7.5873  | 7.5831  | 0.0028  | 0.0114 | -0.1020 | 0.0934  | 0.0000  | 0.1728 |
| N6H26  | 2 | 7.6382  | 7.6564  | 7.6513  | 0.0182  | 0.0155 | -0.1053 | 0.1080  | 0.0000  | 0.1472 |
| C9H28  | 2 | 7.7283  | 7.7588  | 7.7377  | 0.0305  | 0.0117 | -0.1093 | 0.1281  | 0.0000  | 0.3966 |
| H12H29 | 2 | 7.8622  | 7.9431  | 7.9303  | 0.0809  | 0.0289 | -0.0552 | 0.1072  | 0.0000  | 0.3083 |
| H14H28 | 1 | 7.8819  | 7.9182  | 7.8957  | 0.0363  | 0.0120 | -0.1555 | 0.1798  | 0.0000  | 0.4195 |
| C10H27 | 2 | 7.9159  | 7.8694  | 7.8581  | -0.0465 | 0.0126 | -0.0670 | 0.0079  | 0.0000  | 0.2882 |
| H15H30 | 2 | 7.9804  | 8.0274  | 8.0196  | 0.0470  | 0.0179 | -0.0671 | 0.0963  | -0.0001 | 0.2477 |
| C7H26  | 2 | 8.1409  | 8.1580  | 8.1557  | 0.0171  | 0.0132 | -0.1036 | 0.1075  | 0.0000  | 0.1406 |
| H8H26  | 2 | 8.1536  | 8.1561  | 8.1488  | 0.0025  | 0.0134 | -0.1282 | 0.1173  | 0.0000  | 0.2073 |
| H11H30 | 2 | 8.2170  | 8.2486  | 8.2342  | 0.0316  | 0.0181 | -0.0895 | 0.1030  | 0.0000  | 0.3265 |
| H13H28 | 2 | 8.2179  | 8.1729  | 8.1492  | -0.0451 | 0.0150 | -0.1229 | 0.0628  | 0.0000  | 0.4354 |
| C10H30 | 2 | 8.3235  | 8.3371  | 8.3336  | 0.0136  | 0.0108 | -0.1066 | 0.1095  | -0.0001 | 0.1724 |
| H14H30 | 2 | 8.4566  | 8.4817  | 8.4665  | 0.0251  | 0.0159 | -0.1329 | 0.1421  | 0.0000  | 0.3538 |
| C10H26 | 2 | 8.4594  | 8.5006  | 8.4945  | 0.0413  | 0.0168 | -0.1104 | 0.1349  | 0.0000  | 0.2279 |
| C9H25  | 2 | 8.5345  | 8.5571  | 8.5519  | 0.0226  | 0.0055 | -0.0668 | 0.0839  | 0.0000  | 0.2110 |
| H12H28 | 2 | 8.5431  | 8.6086  | 8.5865  | 0.0656  | 0.0204 | -0.1477 | 0.1929  | 0.0000  | 0.4239 |
| C9H30  | 2 | 8.5476  | 8.5323  | 8.5255  | -0.0153 | 0.0126 | -0.1035 | 0.0756  | 0.0000  | 0.2228 |
| C9C23  | 1 | 8.5495  | 8.5384  | 8.5370  | -0.0111 | 0.0020 | -0.0704 | 0.0572  | 0.0001  | 0.1091 |
| H11H25 | 1 | 8.6560  | 8.7054  | 8.6978  | 0.0494  | 0.0085 | -0.0728 | 0.1136  | 0.0001  | 0.2563 |
| H11H27 | 2 | 8.8010  | 8.7760  | 8.7648  | -0.0250 | 0.0097 | -0.0636 | 0.0289  | 0.0000  | 0.2887 |
| H13H30 | 2 | 8.8436  | 8.7605  | 8.7464  | -0.0832 | 0.0164 | -0.0950 | -0.0045 | -0.0001 | 0.3227 |
| C9H27  | 2 | 8.8589  | 8.7984  | 8.7910  | -0.0605 | 0.0061 | -0.0711 | 0.0045  | 0.0000  | 0.2330 |
| H13H27 | 1 | 9.2855  | 9.1726  | 9.1626  | -0.1128 | 0.0099 | -0.0826 | -0.0401 | 0.0000  | 0.3016 |
| H11H26 | 2 | 9.3105  | 9.3407  | 9.3341  | 0.0302  | 0.0112 | -0.1044 | 0.1234  | 0.0000  | 0.2389 |
| H16H30 | 1 | 9.3330  | 9.3158  | 9.3119  | -0.0173 | 0.0160 | -0.1491 | 0.1159  | -0.0001 | 0.1880 |
| C9H26  | 2 | 9.3675  | 9.3647  | 9.3621  | -0.0028 | 0.0088 | -0.1109 | 0.0993  | 0.0000  | 0.1424 |
| H12H30 | 2 | 9.4745  | 9.4730  | 9.4661  | -0.0015 | 0.0191 | -0.1529 | 0.1323  | 0.0000  | 0.2468 |
| H12H27 | 2 | 9.6113  | 9.5661  | 9.5562  | -0.0452 | 0.0123 | -0.1065 | 0.0490  | 0.0000  | 0.2587 |
| H12H26 | 1 | 10.2352 | 10.2322 | 10.2295 | -0.0030 | 0.0139 | -0.1544 | 0.1376  | -0.0001 | 0.1681 |

**Table S5.** Equilibrium ( $r_e$ ) and thermal-average ( $r_g, r_a$ ) distances, vibrational corrections (see text for the notations) and mean amplitudes ( $u$ ) for internuclear distances for *enantiomeric* forms of tetramazine obtained for 359 K at the GED(MP2) refinement (in Å).

( $n$  - number of equivalent parameters)

| Atomic pair | $n$ | $r_e$  | $r_g$  | $r_a$  | $\Delta r$ | $\Delta r(\text{harm})$ | $\Delta r(\text{kin})$ | $\Delta r(\text{dyn})$ | $\Delta r(\text{rot})$ | $u$    |
|-------------|-----|--------|--------|--------|------------|-------------------------|------------------------|------------------------|------------------------|--------|
| N6H8        | 2   | 1.0173 | 1.0417 | 1.0366 | 0.0244     | 0.0326                  | -0.0218                | 0.0136                 | 0.0000                 | 0.0743 |
| C10H15      | 2   | 1.0790 | 1.1188 | 1.1118 | 0.0399     | 0.0681                  | -0.0559                | 0.0277                 | 0.0000                 | 0.0914 |
| C9H11       | 2   | 1.0829 | 1.1089 | 1.1078 | 0.0260     | 0.0692                  | -0.0563                | 0.0132                 | -0.0001                | 0.0659 |
| C10H16      | 2   | 1.0844 | 1.1194 | 1.1152 | 0.0350     | 0.0657                  | -0.0590                | 0.0283                 | 0.0000                 | 0.0702 |
| C9H13       | 2   | 1.0847 | 1.1098 | 1.1098 | 0.0251     | 0.0734                  | -0.0589                | 0.0106                 | 0.0000                 | 0.0590 |
| C9H12       | 2   | 1.0853 | 1.1086 | 1.1064 | 0.0234     | 0.0593                  | -0.0499                | 0.0140                 | 0.0000                 | 0.0594 |
| C10H14      | 2   | 1.0853 | 1.1261 | 1.1205 | 0.0408     | 0.0824                  | -0.0697                | 0.0281                 | 0.0000                 | 0.0856 |
| C1H3        | 2   | 1.0855 | 1.1129 | 1.1075 | 0.0273     | 0.0238                  | -0.0182                | 0.0217                 | 0.0000                 | 0.0773 |
| C1H4        | 2   | 1.0864 | 1.1099 | 1.1047 | 0.0235     | 0.0271                  | -0.0203                | 0.0167                 | 0.0000                 | 0.0765 |
| N5C7        | 2   | 1.4258 | 1.4288 | 1.4274 | 0.0030     | 0.0163                  | -0.0125                | -0.0008                | 0.0000                 | 0.0491 |
| C1N5        | 2   | 1.4387 | 1.4544 | 1.4525 | 0.0157     | 0.0128                  | -0.0093                | 0.0122                 | 0.0000                 | 0.0522 |
| N6C7        | 2   | 1.4392 | 1.4506 | 1.4498 | 0.0114     | 0.0295                  | -0.0211                | 0.0030                 | 0.0000                 | 0.0515 |
| N5N6        | 2   | 1.5142 | 1.5270 | 1.5251 | 0.0128     | 0.0259                  | -0.0156                | 0.0025                 | 0.0000                 | 0.0574 |
| C7C9        | 2   | 1.5182 | 1.5308 | 1.5295 | 0.0125     | 0.0241                  | -0.0206                | 0.0090                 | 0.0000                 | 0.0495 |
| C7C10       | 2   | 1.5192 | 1.5320 | 1.5315 | 0.0128     | 0.0377                  | -0.0286                | 0.0038                 | -0.0001                | 0.0506 |
| C1C2        | 1   | 1.5300 | 1.5423 | 1.5407 | 0.0122     | 0.0117                  | -0.0097                | 0.0103                 | -0.0001                | 0.0509 |
| H15H16      | 2   | 1.7558 | 1.8117 | 1.8001 | 0.0559     | 0.1004                  | -0.0953                | 0.0509                 | -0.0001                | 0.1446 |
| H14H16      | 2   | 1.7606 | 1.8213 | 1.8120 | 0.0608     | 0.1197                  | -0.1096                | 0.0507                 | 0.0000                 | 0.1342 |
| H12H13      | 2   | 1.7642 | 1.7971 | 1.7952 | 0.0329     | 0.1070                  | -0.0937                | 0.0197                 | -0.0001                | 0.0950 |
| H11H13      | 2   | 1.7651 | 1.7954 | 1.7947 | 0.0304     | 0.1131                  | -0.0964                | 0.0137                 | 0.0000                 | 0.0971 |
| H3H4        | 2   | 1.7699 | 1.8034 | 1.7949 | 0.0336     | 0.0343                  | -0.0282                | 0.0275                 | 0.0000                 | 0.1241 |
| H14H15      | 2   | 1.7723 | 1.8278 | 1.8178 | 0.0555     | 0.1266                  | -0.1112                | 0.0401                 | 0.0000                 | 0.1416 |
| H11H12      | 2   | 1.7780 | 1.8077 | 1.8067 | 0.0297     | 0.1069                  | -0.0924                | 0.0152                 | 0.0000                 | 0.0964 |
| C7H8        | 2   | 2.0018 | 2.0257 | 2.0216 | 0.0239     | 0.0470                  | -0.0507                | 0.0275                 | 0.0001                 | 0.1006 |
| N5H8        | 2   | 2.0101 | 2.0306 | 2.0258 | 0.0204     | 0.0342                  | -0.0567                | 0.0429                 | 0.0000                 | 0.1005 |
| H4N5        | 2   | 2.0572 | 2.0790 | 2.0732 | 0.0218     | 0.0280                  | -0.0303                | 0.0242                 | -0.0001                | 0.1106 |
| H3H15       | 2   | 2.0726 | 2.3710 | 2.3417 | 0.2984     | 0.0741                  | -0.0061                | 0.2305                 | -0.0001                | 0.2591 |
| H3N5        | 2   | 2.1105 | 2.1495 | 2.1448 | 0.0390     | 0.0228                  | -0.0166                | 0.0328                 | 0.0000                 | 0.0994 |
| C7H16       | 2   | 2.1286 | 2.1570 | 2.1543 | 0.0284     | 0.0680                  | -0.0666                | 0.0271                 | -0.0001                | 0.1017 |
| C7H11       | 2   | 2.1330 | 2.1598 | 2.1565 | 0.0268     | 0.0633                  | -0.0588                | 0.0223                 | 0.0000                 | 0.1026 |
| C1H17       | 2   | 2.1440 | 2.1751 | 2.1699 | 0.0311     | 0.0231                  | -0.0310                | 0.0390                 | 0.0000                 | 0.1040 |
| C7H13       | 2   | 2.1443 | 2.1678 | 2.1655 | 0.0236     | 0.0677                  | -0.0603                | 0.0162                 | 0.0000                 | 0.0959 |
| C7H14       | 2   | 2.1447 | 2.1839 | 2.1788 | 0.0392     | 0.0819                  | -0.0688                | 0.0262                 | -0.0001                | 0.1176 |
| C7H12       | 2   | 2.1472 | 2.1728 | 2.1669 | 0.0255     | 0.0404                  | -0.0433                | 0.0284                 | 0.0000                 | 0.1130 |
| C1H18       | 2   | 2.1491 | 2.1668 | 2.1613 | 0.0176     | 0.0243                  | -0.0246                | 0.0179                 | 0.0000                 | 0.1094 |
| C7H15       | 2   | 2.1626 | 2.1906 | 2.1860 | 0.0280     | 0.0736                  | -0.0605                | 0.0149                 | 0.0000                 | 0.1091 |
| H8H11       | 2   | 2.3413 | 2.3751 | 2.3529 | 0.0337     | 0.0659                  | -0.0363                | 0.0042                 | -0.0001                | 0.2388 |
| H3H17       | 1   | 2.3899 | 2.4803 | 2.4672 | 0.0905     | 0.0325                  | -0.0232                | 0.0811                 | 0.0001                 | 0.1777 |
| C1N19       | 2   | 2.4085 | 2.4204 | 2.4182 | 0.0119     | 0.0156                  | -0.0068                | 0.0031                 | 0.0000                 | 0.0723 |
| C1N6        | 2   | 2.4111 | 2.4608 | 2.4583 | 0.0497     | 0.0182                  | -0.0188                | 0.0503                 | 0.0000                 | 0.0776 |
| C1C7        | 2   | 2.4544 | 2.4812 | 2.4793 | 0.0268     | 0.0103                  | -0.0153                | 0.0318                 | 0.0000                 | 0.0697 |
| H3N6        | 2   | 2.4762 | 2.5450 | 2.5327 | 0.0688     | 0.0228                  | 0.0186                 | 0.0274                 | 0.0000                 | 0.1521 |
| N5C9        | 2   | 2.4773 | 2.4795 | 2.4781 | 0.0022     | 0.0200                  | -0.0223                | 0.0045                 | 0.0000                 | 0.0638 |
| H12H16      | 2   | 2.4795 | 2.4862 | 2.4612 | 0.0066     | 0.0933                  | -0.0369                | -0.0498                | 0.0000                 | 0.2597 |
| C9C10       | 2   | 2.5049 | 2.5355 | 2.5341 | 0.0305     | 0.0520                  | -0.0417                | 0.0202                 | 0.0000                 | 0.0756 |
| N6C10       | 2   | 2.5259 | 2.5410 | 2.5406 | 0.0151     | 0.0525                  | -0.0457                | 0.0083                 | 0.0000                 | 0.0725 |
| H8C9        | 2   | 2.5326 | 2.5563 | 2.5494 | 0.0237     | 0.0518                  | -0.0569                | 0.0287                 | 0.0001                 | 0.1495 |
| H3H18       | 2   | 2.5337 | 2.5172 | 2.5045 | -0.0164    | 0.0330                  | -0.0704                | 0.0210                 | 0.0000                 | 0.1704 |
| N5H11       | 2   | 2.5459 | 2.5760 | 2.5675 | 0.0301     | 0.0412                  | -0.0428                | 0.0317                 | 0.0000                 | 0.1498 |
| N6C9        | 2   | 2.5553 | 2.5718 | 2.5710 | 0.0165     | 0.0420                  | -0.0359                | 0.0104                 | 0.0000                 | 0.0735 |
| H13H14      | 2   | 2.5763 | 2.8330 | 2.8009 | 0.2567     | 0.0837                  | 0.0048                 | 0.1682                 | 0.0000                 | 0.2981 |
| H4N19       | 2   | 2.5893 | 2.6619 | 2.6489 | 0.0726     | 0.0227                  | 0.0245                 | 0.0253                 | 0.0001                 | 0.1723 |
| N5C10       | 2   | 2.5955 | 2.5963 | 2.5961 | 0.0007     | 0.0492                  | -0.0382                | -0.0103                | 0.0000                 | 0.0696 |

|        |   |        |        |        |         |        |         |         |         |        |
|--------|---|--------|--------|--------|---------|--------|---------|---------|---------|--------|
| H3C7   | 2 | 2.6246 | 2.7218 | 2.7132 | 0.0972  | 0.0182 | -0.0398 | 0.1189  | -0.0001 | 0.1438 |
| N6H15  | 2 | 2.6440 | 2.6172 | 2.6112 | -0.0268 | 0.0815 | -0.0700 | -0.0384 | 0.0001  | 0.1410 |
| H3C10  | 2 | 2.6488 | 2.7660 | 2.7467 | 0.1173  | 0.0343 | -0.0820 | 0.1650  | 0.0000  | 0.1831 |
| C9H16  | 2 | 2.6488 | 2.5996 | 2.5923 | -0.0492 | 0.0871 | -0.0957 | -0.0407 | 0.0001  | 0.1600 |
| C10H13 | 2 | 2.7093 | 2.7620 | 2.7485 | 0.0527  | 0.0748 | -0.0726 | 0.0505  | 0.0000  | 0.1889 |
| N6H11  | 2 | 2.7226 | 2.7499 | 2.7417 | 0.0274  | 0.0645 | -0.0364 | -0.0007 | 0.0000  | 0.1675 |
| C1H15  | 2 | 2.7462 | 2.9468 | 2.9263 | 0.2007  | 0.0536 | 0.0241  | 0.1229  | 0.0001  | 0.2448 |
| C10H12 | 2 | 2.7783 | 2.8229 | 2.8113 | 0.0446  | 0.0542 | -0.0288 | 0.0192  | 0.0000  | 0.1812 |
| C9H14  | 2 | 2.8082 | 2.9850 | 2.9664 | 0.1768  | 0.0691 | -0.0195 | 0.1272  | 0.0000  | 0.2352 |
| N5N19  | 1 | 2.8483 | 2.7639 | 2.7572 | -0.0844 | 0.0259 | -0.0520 | -0.0584 | 0.0001  | 0.1434 |
| N5H15  | 2 | 2.8516 | 2.9446 | 2.9333 | 0.0930  | 0.0778 | -0.0273 | 0.0425  | 0.0000  | 0.1865 |
| H8H12  | 2 | 2.8629 | 2.9065 | 2.8800 | 0.0436  | 0.0532 | -0.0823 | 0.0726  | 0.0001  | 0.2772 |
| H4N20  | 2 | 2.8714 | 3.0594 | 3.0387 | 0.1880  | 0.0344 | -0.0970 | 0.2505  | 0.0001  | 0.2331 |
| H13H16 | 2 | 2.9011 | 2.7822 | 2.7345 | -0.1189 | 0.0995 | -0.1680 | -0.0503 | -0.0001 | 0.3508 |
| H4C7   | 2 | 2.9121 | 2.8964 | 2.8887 | -0.0157 | 0.0203 | 0.0187  | -0.0547 | 0.0000  | 0.1333 |
| C1C10  | 2 | 2.9480 | 2.9657 | 2.9621 | 0.0177  | 0.0296 | -0.0304 | 0.0185  | 0.0000  | 0.1125 |
| N6H12  | 2 | 2.9679 | 3.0039 | 2.9918 | 0.0360  | 0.0449 | -0.0651 | 0.0562  | 0.0000  | 0.1930 |
| N5H13  | 2 | 2.9792 | 2.9735 | 2.9663 | -0.0056 | 0.0543 | -0.0382 | -0.0218 | 0.0001  | 0.1688 |
| N5H14  | 2 | 2.9913 | 2.9070 | 2.9007 | -0.0844 | 0.0880 | -0.0959 | -0.0764 | -0.0001 | 0.1582 |
| H4H14  | 2 | 3.0246 | 2.7429 | 2.6808 | -0.2817 | 0.0660 | 0.0021  | -0.3498 | 0.0000  | 0.3767 |
| N6H16  | 2 | 3.0254 | 3.1593 | 3.1451 | 0.1339  | 0.0605 | -0.0403 | 0.1138  | -0.0001 | 0.2221 |
| H4H18  | 1 | 3.0377 | 3.0629 | 3.0576 | 0.0252  | 0.0302 | -0.0398 | 0.0348  | 0.0000  | 0.1282 |
| H3H14  | 2 | 3.0420 | 2.9154 | 2.8541 | -0.1266 | 0.0632 | -0.2144 | 0.0245  | 0.0001  | 0.3442 |
| H4H15  | 2 | 3.0896 | 3.2715 | 3.2192 | 0.1819  | 0.0396 | 0.1338  | 0.0085  | 0.0000  | 0.3237 |
| C1H8   | 2 | 3.1626 | 3.2095 | 3.2060 | 0.0468  | 0.0310 | -0.0559 | 0.0717  | 0.0000  | 0.1074 |
| H4C10  | 2 | 3.1697 | 3.1163 | 3.0975 | -0.0534 | 0.0308 | 0.0590  | -0.1431 | -0.0001 | 0.1897 |
| C1N20  | 2 | 3.1808 | 3.2927 | 3.2857 | 0.1118  | 0.0176 | -0.0851 | 0.1794  | -0.0001 | 0.1278 |
| C1H14  | 2 | 3.1846 | 2.9855 | 2.9557 | -0.1991 | 0.0631 | -0.1144 | -0.1479 | 0.0001  | 0.2942 |
| H4H22  | 2 | 3.2059 | 3.4089 | 3.3864 | 0.2030  | 0.0491 | -0.0637 | 0.2176  | 0.0000  | 0.2822 |
| H12H14 | 2 | 3.2358 | 3.4516 | 3.4145 | 0.2158  | 0.0634 | -0.0008 | 0.1532  | 0.0000  | 0.3502 |
| H4N6   | 2 | 3.2984 | 3.3180 | 3.3133 | 0.0196  | 0.0256 | -0.0172 | 0.0111  | 0.0001  | 0.1055 |
| H8C10  | 2 | 3.3159 | 3.3466 | 3.3450 | 0.0307  | 0.0719 | -0.0680 | 0.0268  | 0.0000  | 0.1072 |
| H3N19  | 2 | 3.3393 | 3.3716 | 3.3684 | 0.0322  | 0.0189 | -0.0261 | 0.0394  | 0.0000  | 0.1037 |
| N5H12  | 2 | 3.3430 | 3.3512 | 3.3477 | 0.0082  | 0.0362 | -0.0641 | 0.0362  | -0.0001 | 0.1087 |
| N6H14  | 2 | 3.3776 | 3.3513 | 3.3517 | -0.0262 | 0.0946 | -0.1122 | -0.0087 | 0.0001  | 0.0843 |
| H3H8   | 2 | 3.4161 | 3.4735 | 3.4616 | 0.0574  | 0.0326 | -0.0064 | 0.0312  | 0.0000  | 0.1637 |
| N6H13  | 2 | 3.4331 | 3.4445 | 3.4449 | 0.0114  | 0.0808 | -0.0802 | 0.0109  | -0.0001 | 0.0980 |
| C10H11 | 2 | 3.4346 | 3.4626 | 3.4619 | 0.0280  | 0.0877 | -0.0929 | 0.0332  | 0.0000  | 0.0988 |
| C9H15  | 2 | 3.4460 | 3.4588 | 3.4572 | 0.0127  | 0.0807 | -0.0927 | 0.0247  | 0.0000  | 0.0967 |
| N5H16  | 2 | 3.4477 | 3.4725 | 3.4710 | 0.0248  | 0.0662 | -0.0771 | 0.0357  | 0.0000  | 0.1097 |
| H8H13  | 2 | 3.5385 | 3.5480 | 3.5448 | 0.0096  | 0.0895 | -0.1076 | 0.0277  | 0.0000  | 0.1632 |
| H8H15  | 2 | 3.5981 | 3.5654 | 3.5598 | -0.0326 | 0.0955 | -0.0976 | -0.0305 | 0.0000  | 0.1595 |
| H3H16  | 2 | 3.6147 | 3.8247 | 3.8040 | 0.2099  | 0.0453 | -0.0900 | 0.2547  | -0.0001 | 0.2421 |
| H8H16  | 2 | 3.6535 | 3.7854 | 3.7743 | 0.1319  | 0.0808 | -0.0533 | 0.1044  | 0.0000  | 0.2270 |
| H11H16 | 2 | 3.6702 | 3.6312 | 3.6269 | -0.0390 | 0.1109 | -0.1340 | -0.0160 | 0.0001  | 0.1740 |
| C1H22  | 2 | 3.6741 | 3.7729 | 3.7652 | 0.0987  | 0.0319 | -0.1033 | 0.1701  | 0.0000  | 0.1697 |
| C1C21  | 2 | 3.7039 | 3.7362 | 3.7343 | 0.0323  | 0.0085 | -0.0420 | 0.0659  | -0.0001 | 0.0777 |
| H12H15 | 2 | 3.7112 | 3.6715 | 3.6645 | -0.0397 | 0.0782 | -0.1056 | -0.0123 | 0.0000  | 0.1721 |
| H13H15 | 2 | 3.7423 | 3.8186 | 3.8078 | 0.0763  | 0.0959 | -0.1104 | 0.0908  | 0.0000  | 0.2040 |
| C1C9   | 2 | 3.7482 | 3.7618 | 3.7603 | 0.0135  | 0.0209 | -0.0291 | 0.0218  | -0.0001 | 0.0758 |
| H11H14 | 2 | 3.7500 | 3.8873 | 3.8761 | 0.1373  | 0.1019 | -0.0902 | 0.1256  | 0.0000  | 0.2115 |
| H4C21  | 2 | 3.7878 | 3.8879 | 3.8781 | 0.1000  | 0.0154 | -0.0570 | 0.1417  | -0.0001 | 0.1875 |
| N5N20  | 2 | 3.9499 | 3.9092 | 3.8944 | -0.0408 | 0.0144 | -0.1645 | 0.1093  | 0.0000  | 0.1509 |
| C1H11  | 2 | 3.9561 | 3.9849 | 3.9789 | 0.0288  | 0.0408 | -0.0559 | 0.0438  | 0.0001  | 0.1562 |
| C1H16  | 2 | 3.9745 | 4.0395 | 4.0349 | 0.0649  | 0.0446 | -0.0690 | 0.0893  | 0.0000  | 0.1453 |
| H4C9   | 2 | 4.0072 | 3.9801 | 3.9742 | -0.0271 | 0.0303 | -0.0058 | -0.0516 | 0.0000  | 0.1560 |
| H4H8   | 2 | 4.0160 | 4.0428 | 4.0383 | 0.0267  | 0.0371 | -0.0774 | 0.0670  | 0.0000  | 0.1347 |
| H3N20  | 2 | 4.0167 | 4.1962 | 4.1873 | 0.1794  | 0.0169 | -0.0563 | 0.2188  | 0.0000  | 0.1878 |
| H4H13  | 2 | 4.0268 | 3.9902 | 3.9760 | -0.0367 | 0.0559 | 0.0135  | -0.1061 | 0.0000  | 0.2551 |
| C1H13  | 2 | 4.0595 | 4.0572 | 4.0500 | -0.0023 | 0.0460 | -0.0348 | -0.0135 | 0.0000  | 0.1825 |

|        |   |        |        |        |         |        |         |         |         |        |
|--------|---|--------|--------|--------|---------|--------|---------|---------|---------|--------|
| H3C9   | 2 | 4.1022 | 4.1903 | 4.1842 | 0.0881  | 0.0262 | -0.0636 | 0.1255  | 0.0000  | 0.1458 |
| C1H29  | 2 | 4.1137 | 4.3362 | 4.3247 | 0.2224  | 0.0344 | -0.0456 | 0.2336  | 0.0000  | 0.2275 |
| H8H14  | 2 | 4.1238 | 4.1497 | 4.1473 | 0.0259  | 0.1051 | -0.1243 | 0.0452  | -0.0001 | 0.1338 |
| N5H22  | 2 | 4.1864 | 4.1112 | 4.0884 | -0.0752 | 0.0306 | -0.2315 | 0.1256  | 0.0001  | 0.2145 |
| H4H16  | 2 | 4.2502 | 4.1774 | 4.1665 | -0.0728 | 0.0473 | -0.0034 | -0.1167 | 0.0000  | 0.1870 |
| H11H15 | 2 | 4.2671 | 4.2871 | 4.2852 | 0.0200  | 0.1127 | -0.1283 | 0.0356  | 0.0000  | 0.1343 |
| N5C21  | 2 | 4.2672 | 4.1559 | 4.1513 | -0.1114 | 0.0113 | -0.0513 | -0.0713 | -0.0001 | 0.1425 |
| H4H11  | 2 | 4.2768 | 4.2842 | 4.2727 | 0.0073  | 0.0487 | -0.0742 | 0.0329  | -0.0001 | 0.2201 |
| H4H29  | 2 | 4.3259 | 4.4819 | 4.4624 | 0.1560  | 0.0416 | -0.1564 | 0.2708  | 0.0000  | 0.2326 |
| C1C24  | 2 | 4.4112 | 4.4376 | 4.4344 | 0.0263  | 0.0166 | -0.0725 | 0.0822  | 0.0000  | 0.1105 |
| H3H29  | 2 | 4.4619 | 4.7965 | 4.7801 | 0.3346  | 0.0365 | -0.0272 | 0.3253  | 0.0000  | 0.2834 |
| H3H13  | 2 | 4.4696 | 4.5568 | 4.5448 | 0.0872  | 0.0481 | -0.1032 | 0.1423  | 0.0000  | 0.1995 |
| H3H11  | 2 | 4.5066 | 4.5821 | 4.5756 | 0.0755  | 0.0445 | -0.0763 | 0.1074  | -0.0001 | 0.1752 |
| H3C21  | 2 | 4.5144 | 4.5936 | 4.5900 | 0.0792  | 0.0112 | -0.0524 | 0.1205  | -0.0001 | 0.1231 |
| C1H12  | 2 | 4.5761 | 4.6007 | 4.5976 | 0.0246  | 0.0307 | -0.0622 | 0.0561  | 0.0000  | 0.1181 |
| H3H22  | 2 | 4.6192 | 4.7728 | 4.7632 | 0.1536  | 0.0257 | -0.0731 | 0.2009  | 0.0001  | 0.2125 |
| H4C24  | 2 | 4.6438 | 4.7092 | 4.6980 | 0.0654  | 0.0209 | -0.1388 | 0.1833  | 0.0000  | 0.1734 |
| C1H28  | 2 | 4.7137 | 4.4497 | 4.4294 | -0.2640 | 0.0370 | -0.1229 | -0.1781 | 0.0000  | 0.2991 |
| H3H12  | 2 | 4.7446 | 4.8537 | 4.8449 | 0.1091  | 0.0340 | -0.0780 | 0.1531  | 0.0000  | 0.1975 |
| H4H25  | 2 | 4.7836 | 4.8906 | 4.8720 | 0.1070  | 0.0363 | 0.0419  | 0.0288  | 0.0000  | 0.2716 |
| N5H25  | 2 | 4.8051 | 4.6170 | 4.6002 | -0.1880 | 0.0513 | -0.0602 | -0.1792 | 0.0001  | 0.2858 |
| C1H25  | 2 | 4.8126 | 4.8078 | 4.8003 | -0.0048 | 0.0364 | -0.0223 | -0.0189 | 0.0000  | 0.1860 |
| C1C23  | 2 | 4.8843 | 4.8766 | 4.8751 | -0.0077 | 0.0169 | -0.0261 | 0.0015  | 0.0000  | 0.0893 |
| H4H12  | 2 | 4.9231 | 4.8856 | 4.8790 | -0.0376 | 0.0374 | -0.0253 | -0.0497 | 0.0000  | 0.1745 |
| H4C23  | 2 | 4.9472 | 5.0339 | 5.0250 | 0.0868  | 0.0188 | -0.0124 | 0.0804  | 0.0000  | 0.2089 |
| H3C24  | 2 | 4.9523 | 5.0418 | 5.0351 | 0.0896  | 0.0195 | -0.0821 | 0.1522  | 0.0000  | 0.1723 |
| N5C23  | 2 | 5.1069 | 4.9211 | 4.9137 | -0.1858 | 0.0246 | -0.0313 | -0.1791 | 0.0000  | 0.1930 |
| N5H29  | 2 | 5.1385 | 5.2821 | 5.2716 | 0.1436  | 0.0194 | -0.0039 | 0.1281  | 0.0000  | 0.2308 |
| H4H28  | 2 | 5.1603 | 4.9648 | 4.9471 | -0.1956 | 0.0371 | -0.1855 | -0.0472 | 0.0000  | 0.2823 |
| N5C24  | 2 | 5.1957 | 5.1017 | 5.0981 | -0.0939 | 0.0105 | -0.0286 | -0.0759 | 0.0001  | 0.1262 |
| H3H28  | 2 | 5.1958 | 4.9235 | 4.8943 | -0.2723 | 0.0369 | -0.1620 | -0.1473 | 0.0001  | 0.3668 |
| N6N20  | 1 | 5.2073 | 5.2295 | 5.2143 | 0.0222  | 0.0090 | -0.1983 | 0.2114  | 0.0001  | 0.1522 |
| N6C21  | 2 | 5.2791 | 5.2329 | 5.2255 | -0.0463 | 0.0114 | -0.1407 | 0.0831  | -0.0001 | 0.1429 |
| C1H27  | 2 | 5.2997 | 5.2583 | 5.2502 | -0.0413 | 0.0331 | -0.0050 | -0.0695 | 0.0001  | 0.2132 |
| N5H28  | 2 | 5.3275 | 4.9999 | 4.9766 | -0.3276 | 0.0285 | -0.0181 | -0.3380 | 0.0000  | 0.2816 |
| C1H30  | 2 | 5.3857 | 5.5112 | 5.5051 | 0.1255  | 0.0284 | -0.1114 | 0.2086  | -0.0001 | 0.1642 |
| N5H27  | 2 | 5.3918 | 5.1887 | 5.1663 | -0.2031 | 0.0391 | 0.0493  | -0.2915 | 0.0000  | 0.3094 |
| C7H22  | 2 | 5.4585 | 5.3374 | 5.3243 | -0.1211 | 0.0225 | -0.1872 | 0.0437  | -0.0001 | 0.2247 |
| H4H30  | 2 | 5.4934 | 5.7149 | 5.6971 | 0.2215  | 0.0313 | -0.1660 | 0.3562  | 0.0000  | 0.2526 |
| H4H27  | 2 | 5.5595 | 5.6016 | 5.5899 | 0.0421  | 0.0304 | -0.0054 | 0.0171  | 0.0000  | 0.2504 |
| N6H22  | 2 | 5.5698 | 5.5111 | 5.4865 | -0.0587 | 0.0141 | -0.2811 | 0.2083  | 0.0000  | 0.2137 |
| H4H26  | 2 | 5.6656 | 5.7768 | 5.7643 | 0.1112  | 0.0272 | -0.0933 | 0.1773  | 0.0000  | 0.2653 |
| C7C21  | 1 | 5.6885 | 5.5633 | 5.5594 | -0.1252 | 0.0038 | -0.0585 | -0.0706 | 0.0001  | 0.1461 |
| C1H26  | 2 | 5.7243 | 5.7381 | 5.7348 | 0.0138  | 0.0239 | -0.0893 | 0.0791  | 0.0001  | 0.1353 |
| H3C23  | 2 | 5.7996 | 5.8187 | 5.8164 | 0.0191  | 0.0158 | -0.0516 | 0.0549  | 0.0000  | 0.1158 |
| H8H25  | 2 | 5.7999 | 5.4691 | 5.4161 | -0.3308 | 0.0431 | -0.3251 | -0.0489 | 0.0001  | 0.4375 |
| H3H25  | 2 | 5.8266 | 5.8305 | 5.8239 | 0.0039  | 0.0309 | -0.0523 | 0.0253  | 0.0000  | 0.1967 |
| H11H25 | 1 | 5.8327 | 5.3637 | 5.3075 | -0.4690 | 0.0755 | -0.0245 | -0.5201 | 0.0001  | 0.5317 |
| H8H22  | 1 | 5.8417 | 5.6951 | 5.6497 | -0.1466 | 0.0169 | -0.4001 | 0.2366  | 0.0000  | 0.2814 |
| N6H29  | 2 | 5.8418 | 6.1996 | 6.1873 | 0.3578  | 0.0284 | 0.0038  | 0.3256  | 0.0000  | 0.2769 |
| N6H28  | 2 | 5.8451 | 5.6016 | 5.5846 | -0.2435 | 0.0432 | -0.0868 | -0.1999 | 0.0000  | 0.3035 |
| N6H25  | 2 | 5.9184 | 5.6799 | 5.6516 | -0.2385 | 0.0284 | -0.2246 | -0.0423 | 0.0000  | 0.3414 |
| H3H30  | 2 | 5.9481 | 6.1619 | 6.1527 | 0.2138  | 0.0278 | -0.1115 | 0.2975  | 0.0000  | 0.2189 |
| N6C24  | 2 | 5.9494 | 5.9737 | 5.9711 | 0.0243  | 0.0212 | -0.0796 | 0.0827  | 0.0000  | 0.1257 |
| H8H28  | 2 | 5.9771 | 5.7067 | 5.6848 | -0.2704 | 0.0510 | -0.0334 | -0.2880 | 0.0000  | 0.3047 |
| H8H27  | 2 | 6.0047 | 5.7254 | 5.6948 | -0.2793 | 0.0552 | -0.1162 | -0.2183 | 0.0000  | 0.4260 |
| H8C23  | 2 | 6.0677 | 5.7955 | 5.7722 | -0.2722 | 0.0319 | -0.2241 | -0.0801 | 0.0001  | 0.3204 |
| N5H26  | 2 | 6.0724 | 5.8838 | 5.8774 | -0.1886 | 0.0282 | -0.1118 | -0.1050 | 0.0000  | 0.1982 |
| N6C23  | 2 | 6.1156 | 5.9354 | 5.9236 | -0.1802 | 0.0176 | -0.1636 | -0.0342 | 0.0000  | 0.2212 |
| C7H25  | 2 | 6.1328 | 5.8338 | 5.8133 | -0.2990 | 0.0257 | -0.0390 | -0.2857 | 0.0000  | 0.3317 |

|        |   |        |        |        |         |        |         |         |         |        |
|--------|---|--------|--------|--------|---------|--------|---------|---------|---------|--------|
| H3H27  | 2 | 6.1566 | 6.1228 | 6.1149 | -0.0339 | 0.0308 | -0.0471 | -0.0175 | -0.0001 | 0.2287 |
| N6H27  | 2 | 6.1787 | 5.9782 | 5.9584 | -0.2005 | 0.0357 | -0.0962 | -0.1401 | 0.0001  | 0.3449 |
| N5H30  | 2 | 6.1797 | 6.1018 | 6.0990 | -0.0779 | 0.0222 | -0.0935 | -0.0066 | 0.0000  | 0.1427 |
| H8C24  | 2 | 6.1959 | 6.1394 | 6.1340 | -0.0565 | 0.0265 | -0.0762 | -0.0068 | 0.0000  | 0.1857 |
| H8H29  | 2 | 6.2523 | 6.5345 | 6.5196 | 0.2822  | 0.0277 | 0.0091  | 0.2454  | 0.0000  | 0.2992 |
| C7H29  | 2 | 6.4429 | 6.6607 | 6.6528 | 0.2178  | 0.0179 | -0.0299 | 0.2298  | 0.0000  | 0.2320 |
| C9H25  | 2 | 6.4706 | 6.0109 | 5.9720 | -0.4597 | 0.0398 | 0.0167  | -0.5162 | 0.0000  | 0.4315 |
| C7C23  | 2 | 6.5062 | 6.2517 | 6.2420 | -0.2545 | 0.0089 | -0.0309 | -0.2325 | 0.0000  | 0.2262 |
| H15H29 | 1 | 6.5335 | 7.1199 | 7.1045 | 0.5864  | 0.0546 | -0.0334 | 0.5652  | 0.0000  | 0.3506 |
| C7C24  | 2 | 6.5798 | 6.5160 | 6.5134 | -0.0638 | 0.0072 | -0.0573 | -0.0137 | 0.0000  | 0.1226 |
| H3H26  | 2 | 6.6128 | 6.6743 | 6.6703 | 0.0615  | 0.0207 | -0.0985 | 0.1393  | 0.0000  | 0.1605 |
| H11H27 | 2 | 6.6320 | 6.1851 | 6.1136 | -0.4469 | 0.0439 | 0.1748  | -0.6656 | 0.0000  | 0.4893 |
| C7H28  | 2 | 6.6806 | 6.3575 | 6.3406 | -0.3231 | 0.0192 | -0.0628 | -0.2794 | -0.0001 | 0.2917 |
| C7H27  | 2 | 6.7685 | 6.4878 | 6.4635 | -0.2807 | 0.0175 | 0.0386  | -0.3368 | 0.0000  | 0.3431 |
| C10H29 | 2 | 7.0045 | 7.3041 | 7.2958 | 0.2995  | 0.0338 | -0.0867 | 0.3524  | 0.0000  | 0.2528 |
| N6H30  | 2 | 7.0048 | 7.0014 | 6.9983 | -0.0033 | 0.0295 | -0.1479 | 0.1151  | 0.0000  | 0.1371 |
| C9C23  | 1 | 7.0479 | 6.6313 | 6.6067 | -0.4166 | 0.0156 | 0.0228  | -0.4550 | 0.0000  | 0.3297 |
| H8H26  | 2 | 7.1329 | 6.8458 | 6.8252 | -0.2872 | 0.0321 | -0.2795 | -0.0398 | 0.0000  | 0.3134 |
| N6H26  | 2 | 7.1375 | 6.9646 | 6.9542 | -0.1729 | 0.0221 | -0.2153 | 0.0202  | 0.0001  | 0.2104 |
| H14H29 | 2 | 7.1989 | 7.1411 | 7.1192 | -0.0578 | 0.0414 | -0.1878 | 0.0887  | -0.0001 | 0.3949 |
| H8H30  | 2 | 7.2286 | 7.0835 | 7.0784 | -0.1450 | 0.0330 | -0.1624 | -0.0156 | 0.0000  | 0.2027 |
| C10H25 | 2 | 7.2781 | 7.0256 | 7.0080 | -0.2524 | 0.0096 | 0.0120  | -0.2741 | 0.0001  | 0.2735 |
| C9H27  | 2 | 7.2925 | 6.8607 | 6.8111 | -0.4318 | 0.0184 | 0.1331  | -0.5833 | 0.0000  | 0.4168 |
| H11H28 | 2 | 7.2942 | 6.8960 | 6.8553 | -0.3982 | 0.0191 | 0.0976  | -0.5150 | 0.0001  | 0.3121 |
| C10C24 | 1 | 7.3456 | 7.3671 | 7.3645 | 0.0215  | 0.0168 | -0.1100 | 0.1147  | 0.0000  | 0.1445 |
| H11H29 | 2 | 7.4441 | 7.4566 | 7.4406 | 0.0125  | 0.0118 | 0.0026  | -0.0018 | -0.0001 | 0.3066 |
| H11H26 | 2 | 7.4676 | 6.9713 | 6.9372 | -0.4963 | 0.0366 | -0.0914 | -0.4415 | 0.0000  | 0.4660 |
| C7H26  | 2 | 7.4736 | 7.2220 | 7.2140 | -0.2517 | 0.0151 | -0.1087 | -0.1581 | 0.0000  | 0.2323 |
| C10H28 | 2 | 7.5496 | 7.2572 | 7.2424 | -0.2925 | 0.0233 | -0.1655 | -0.1502 | -0.0001 | 0.3259 |
| C7H30  | 2 | 7.5782 | 7.5317 | 7.5292 | -0.0465 | 0.0176 | -0.1140 | 0.0499  | 0.0000  | 0.1445 |
| C9C24  | 2 | 7.5862 | 7.3882 | 7.3809 | -0.1981 | 0.0025 | -0.0203 | -0.1802 | -0.0001 | 0.1730 |
| C9H29  | 2 | 7.6019 | 7.6756 | 7.6677 | 0.0737  | 0.0093 | -0.0213 | 0.0857  | 0.0000  | 0.2324 |
| C9H28  | 2 | 7.6715 | 7.2742 | 7.2506 | -0.3973 | 0.0106 | 0.0178  | -0.4257 | 0.0000  | 0.2747 |
| H13H27 | 1 | 7.6732 | 7.1852 | 7.1054 | -0.4880 | 0.0150 | 0.2295  | -0.7325 | 0.0000  | 0.4725 |
| H14H28 | 1 | 7.8944 | 7.3541 | 7.3298 | -0.5403 | 0.0259 | -0.2216 | -0.3446 | 0.0000  | 0.4180 |
| H13H29 | 2 | 7.9448 | 7.9069 | 7.8933 | -0.0379 | 0.0159 | -0.0331 | -0.0207 | 0.0000  | 0.3193 |
| C10H27 | 2 | 7.9471 | 7.7132 | 7.6963 | -0.2339 | 0.0072 | 0.0044  | -0.2455 | 0.0000  | 0.3018 |
| H15H30 | 2 | 8.0041 | 8.4132 | 8.4038 | 0.4091  | 0.0415 | -0.1069 | 0.4745  | 0.0000  | 0.2767 |
| C9H26  | 2 | 8.0225 | 7.5755 | 7.5550 | -0.4470 | 0.0187 | -0.0746 | -0.3911 | 0.0000  | 0.3561 |
| H13H28 | 2 | 8.1647 | 7.7063 | 7.6744 | -0.4584 | 0.0119 | 0.0335  | -0.5037 | -0.0001 | 0.3479 |
| H11H30 | 2 | 8.1905 | 7.8602 | 7.8441 | -0.3303 | 0.0164 | -0.0679 | -0.2788 | 0.0000  | 0.3105 |
| H12H27 | 2 | 8.1924 | 7.7449 | 7.7042 | -0.4475 | 0.0222 | 0.0288  | -0.4984 | -0.0001 | 0.4553 |
| C10H30 | 2 | 8.3330 | 8.4401 | 8.4366 | 0.1072  | 0.0263 | -0.1437 | 0.2245  | 0.0001  | 0.1748 |
| H12H29 | 2 | 8.4657 | 8.6196 | 8.6118 | 0.1539  | 0.0178 | -0.0644 | 0.2005  | 0.0000  | 0.2515 |
| H14H30 | 2 | 8.4673 | 8.3298 | 8.3153 | -0.1375 | 0.0323 | -0.1862 | 0.0164  | 0.0000  | 0.3477 |
| C10H26 | 2 | 8.4799 | 8.3164 | 8.3106 | -0.1635 | 0.0112 | -0.0870 | -0.0878 | 0.0001  | 0.1883 |
| H12H28 | 2 | 8.4895 | 8.1217 | 8.1020 | -0.3678 | 0.0192 | -0.0578 | -0.3292 | 0.0000  | 0.3062 |
| C9H30  | 2 | 8.5326 | 8.3028 | 8.2962 | -0.2298 | 0.0112 | -0.0858 | -0.1551 | -0.0001 | 0.2057 |
| H13H30 | 2 | 8.8329 | 8.5614 | 8.5450 | -0.2715 | 0.0149 | -0.0459 | -0.2405 | 0.0000  | 0.3349 |
| H12H26 | 1 | 9.0223 | 8.5572 | 8.5390 | -0.4651 | 0.0210 | -0.1624 | -0.3237 | 0.0000  | 0.3763 |
| H16H30 | 1 | 9.3409 | 9.4869 | 9.4829 | 0.1460  | 0.0343 | -0.1851 | 0.2968  | 0.0000  | 0.1903 |
| H12H30 | 2 | 9.4592 | 9.2548 | 9.2491 | -0.2044 | 0.0183 | -0.1543 | -0.0685 | 0.0001  | 0.2188 |

**Table S6.** Cartesian coordinates of the *meso* form of tetramezine obtained at the GED(MP2) refinement.

| Atom | X         | Y         | Z         |
|------|-----------|-----------|-----------|
| C1   | -0.007311 | 0.021446  | -0.004011 |
| C2   | 0.005827  | -0.023149 | 1.525330  |
| H3   | 0.841051  | -0.534928 | -0.385588 |
| H4   | 0.063114  | 1.053506  | -0.335639 |
| N5   | -1.278248 | -0.501684 | -0.430356 |
| N6   | -1.161774 | -1.990293 | -0.682332 |
| C7   | -1.372242 | -1.044096 | -1.745693 |
| H8   | -2.070325 | -2.350833 | -0.400342 |
| C9   | -2.745106 | -0.927578 | -2.383096 |
| C10  | -0.271046 | -0.908598 | -2.782622 |
| H11  | -3.499402 | -0.943652 | -1.606209 |
| H12  | -2.903801 | -1.749091 | -3.074156 |
| H13  | -2.819003 | 0.006886  | -2.928825 |
| H14  | -0.255930 | 0.104838  | -3.170578 |
| H15  | 0.693175  | -1.158497 | -2.368035 |
| H16  | -0.482567 | -1.587271 | -3.601385 |
| H17  | -0.842534 | 0.533225  | 1.906907  |
| H18  | -0.064598 | -1.055209 | 1.856958  |
| N19  | 1.276765  | 0.499981  | 1.951676  |
| N20  | 1.160291  | 1.988590  | 2.203652  |
| C21  | 1.370758  | 1.042393  | 3.267012  |
| H22  | 2.068842  | 2.349130  | 1.921662  |
| C23  | 2.743622  | 0.925875  | 3.904415  |
| C24  | 0.269562  | 0.906895  | 4.303941  |
| H25  | 3.497918  | 0.941949  | 3.127529  |
| H26  | 2.902317  | 1.747388  | 4.595475  |
| H27  | 2.817519  | -0.008589 | 4.450144  |
| H28  | 0.254446  | -0.106541 | 4.691897  |
| H29  | -0.694658 | 1.156794  | 3.889354  |
| H30  | 0.481084  | 1.585568  | 5.122704  |

**Table S7.** Cartesian coordinates of the *enantiomeric* form of tetramezine obtained at the GED(MP2) refinement.

| Atom | X         | Y         | Z         |
|------|-----------|-----------|-----------|
| C1   | 0.019912  | 0.025409  | -0.002608 |
| C2   | 0.021762  | -0.024236 | 1.526606  |
| H3   | 0.955036  | -0.386146 | -0.369378 |
| H4   | -0.066800 | 1.058326  | -0.327816 |
| N5   | -1.129629 | -0.696557 | -0.479184 |
| N6   | -0.754023 | -2.144518 | -0.713958 |
| C7   | -1.074654 | -1.247703 | -1.792973 |
| H8   | -1.600815 | -2.650644 | -0.465499 |
| C9   | -2.420643 | -1.362293 | -2.485970 |
| C10  | 0.029122  | -0.936359 | -2.789280 |
| H11  | -3.192227 | -1.497765 | -1.738313 |
| H12  | -2.414095 | -2.201966 | -3.173529 |
| H13  | -2.624816 | -0.455180 | -3.044658 |
| H14  | -0.105579 | 0.065414  | -3.184501 |
| H15  | 1.005886  | -1.026527 | -2.339889 |
| H16  | -0.038534 | -1.641603 | -3.610177 |
| H17  | 0.956863  | 0.389321  | 1.891177  |
| H18  | -0.061973 | -1.057335 | 1.852014  |
| N19  | -1.128197 | 0.695269  | 2.005885  |
| N20  | -0.755141 | 2.144032  | 2.239779  |
| C21  | -1.071314 | 1.246534  | 3.319542  |
| H22  | -1.603597 | 2.648343  | 1.993312  |
| C23  | -2.415913 | 1.358245  | 4.015701  |
| C24  | 0.035464  | 0.937557  | 4.313250  |
| H25  | -3.189541 | 1.492063  | 3.269861  |
| H26  | -2.409546 | 2.197931  | 4.703245  |
| H27  | -2.616830 | 0.450698  | 4.574866  |
| H28  | -0.096162 | -0.064501 | 4.708785  |
| H29  | 1.010974  | 1.029815  | 3.861565  |
| H30  | -0.031770 | 1.642656  | 5.134306  |



**Table S8.** Cartesian coordinates of the *meso* form of tetramezine obtained at the GED(B3LYP) refinement.

| Atom | X         | Y         | Z         |
|------|-----------|-----------|-----------|
| C1   | 0.017524  | 0.019693  | -0.004014 |
| C2   | -0.017524 | -0.019693 | 1.525335  |
| H3   | 0.885018  | -0.522801 | -0.367365 |
| H4   | 0.084444  | 1.049751  | -0.345950 |
| N5   | -1.243649 | -0.520681 | -0.448709 |
| N6   | -1.158630 | -2.001417 | -0.721708 |
| C7   | -1.370811 | -1.040437 | -1.769940 |
| H8   | -2.056540 | -2.375325 | -0.420837 |
| C9   | -2.776648 | -0.903158 | -2.328454 |
| C10  | -0.238297 | -0.927031 | -2.775635 |
| H11  | -3.478255 | -0.923000 | -1.502805 |
| H12  | -2.963178 | -1.722353 | -3.017700 |
| H13  | -2.853947 | 0.042698  | -2.856991 |
| H14  | -0.226631 | 0.081932  | -3.178565 |
| H15  | 0.704507  | -1.164521 | -2.305130 |
| H16  | -0.435457 | -1.634021 | -3.575667 |
| H17  | -0.885018 | 0.522801  | 1.888686  |
| H18  | -0.084444 | -1.049751 | 1.867271  |
| N19  | 1.243649  | 0.520681  | 1.970030  |
| N20  | 1.158630  | 2.001417  | 2.243029  |
| C21  | 1.370811  | 1.040437  | 3.291261  |
| H22  | 2.056540  | 2.375325  | 1.942158  |
| C23  | 2.776648  | 0.903158  | 3.849775  |
| C24  | 0.238297  | 0.927031  | 4.296956  |
| H25  | 3.478255  | 0.923000  | 3.024126  |
| H26  | 2.963178  | 1.722353  | 4.539021  |
| H27  | 2.853947  | -0.042698 | 4.378312  |
| H28  | 0.226631  | -0.081932 | 4.699886  |
| H29  | -0.704507 | 1.164521  | 3.826451  |
| H30  | 0.435457  | 1.634021  | 5.096988  |

**Table S9.** Cartesian coordinates of the *enantiomeric* form of tetramezine obtained at the GED(B3LYP) refinement.

| Atom | X         | Y         | Z         |
|------|-----------|-----------|-----------|
| C1   | 0.045524  | 0.026558  | -0.002736 |
| C2   | 0.045524  | -0.026558 | 1.526782  |
| H3   | 0.999300  | -0.344826 | -0.369715 |
| H4   | -0.073376 | 1.054380  | -0.336329 |
| N5   | -1.079873 | -0.741160 | -0.476723 |
| N6   | -0.692236 | -2.167229 | -0.775124 |
| C7   | -1.081816 | -1.246650 | -1.809157 |
| H8   | -1.499552 | -2.721201 | -0.496130 |
| C9   | -2.479261 | -1.385454 | -2.388478 |
| C10  | 0.015577  | -0.888241 | -2.797207 |
| H11  | -3.172057 | -1.562050 | -1.574205 |
| H12  | -2.487371 | -2.211884 | -3.094226 |
| H13  | -2.739443 | -0.464521 | -2.902484 |
| H14  | -0.175702 | 0.107734  | -3.187157 |
| H15  | 0.983082  | -0.934916 | -2.318907 |
| H16  | -0.023551 | -1.608083 | -3.609081 |
| H17  | 0.999300  | 0.344826  | 1.893761  |
| H18  | -0.073376 | -1.054380 | 1.860375  |
| N19  | -1.079873 | 0.741160  | 2.000769  |
| N20  | -0.692236 | 2.167229  | 2.299170  |
| C21  | -1.081816 | 1.246650  | 3.333203  |
| H22  | -1.499552 | 2.721201  | 2.020176  |
| C23  | -2.479261 | 1.385454  | 3.912524  |
| C24  | 0.015577  | 0.888241  | 4.321253  |
| H25  | -3.172057 | 1.562050  | 3.098251  |
| H26  | -2.487371 | 2.211884  | 4.618272  |
| H27  | -2.739443 | 0.464521  | 4.426530  |
| H28  | -0.175702 | -0.107734 | 4.711203  |
| H29  | 0.983082  | 0.934916  | 3.842953  |
| H30  | -0.023551 | 1.608083  | 5.133127  |

**Table S10.** Correlation matrix for the GED (B3LYP) refinement of the geometrical parameters united in the independent groups.

|                                       | CC      | NN      | C <sub>Me</sub> -C-C <sub>Me</sub> | CN      | C <sub>Eth</sub> -C <sub>Eth</sub> -N | H-C <sub>Me</sub> -H | CH     |
|---------------------------------------|---------|---------|------------------------------------|---------|---------------------------------------|----------------------|--------|
| CC                                    | 1.0000  |         |                                    |         |                                       |                      |        |
| NN                                    | -0.6595 | 1.0000  |                                    |         |                                       |                      |        |
| C <sub>Me</sub> -C-C <sub>Me</sub>    | 0.2481  | -0.4553 | 1.0000                             |         |                                       |                      |        |
| CN                                    | -0.6139 | 0.1118  | 0.3206                             | 1.0000  |                                       |                      |        |
| C <sub>Eth</sub> -C <sub>Eth</sub> -N | 0.2484  | -0.2937 | -0.1959                            | -0.3047 | 1.0000                                |                      |        |
| H-C <sub>Me</sub> -H                  | -0.1333 | 0.1274  | 0.2979                             | 0.1760  | -0.8974                               | 1.0000               |        |
| CH                                    | 0.3757  | -0.1276 | -0.0758                            | -0.4839 | 0.1524                                | 0.1113               | 1.0000 |

**Table S11.** Correlation matrix for the GED (MP2) refinement of the geometrical parameters united in the independent groups.

|                                       | CC      | NN      | C <sub>Me</sub> -C-C <sub>Me</sub> | CN      | C <sub>Eth</sub> -C <sub>Eth</sub> -N | H-C <sub>Me</sub> -H | CH     |
|---------------------------------------|---------|---------|------------------------------------|---------|---------------------------------------|----------------------|--------|
| CC                                    | 1.0000  |         |                                    |         |                                       |                      |        |
| NN                                    | -0.6995 | 1.0000  |                                    |         |                                       |                      |        |
| C <sub>Me</sub> -C-C <sub>Me</sub>    | 0.1749  | -0.3443 | 1.0000                             |         |                                       |                      |        |
| CN                                    | -0.5813 | 0.1107  | 0.3879                             | 1.0000  |                                       |                      |        |
| C <sub>Eth</sub> -C <sub>Eth</sub> -N | 0.3319  | -0.3455 | -0.4443                            | -0.3290 | 1.0000                                |                      |        |
| H-C <sub>Me</sub> -H                  | -0.2411 | 0.2265  | 0.5090                             | 0.2551  | -0.8955                               | 1.0000               |        |
| CH                                    | 0.3653  | -0.1154 | -0.0629                            | -0.4808 | 0.0395                                | 0.1189               | 1.0000 |

## 5. Results of quantum-chemical calculations

**Table S12.** Cartesian coordinates of the *meso* form of tetramazine found by the MP2/cc-pVTZ calculation.

| Atom | X             | Y             | Z             |
|------|---------------|---------------|---------------|
| C1   | -0.019015261  | 0.0199803361  | 0.006543227   |
| C2   | 0.019015261   | -0.0199803361 | 1.514777773   |
| H3   | 0.8303590663  | -0.5336887387 | -0.3821103807 |
| H4   | 0.0463793023  | 1.0549619285  | -0.3232990225 |
| N5   | -1.297336587  | -0.5075175112 | -0.434547364  |
| N6   | -1.1775226829 | -1.9819857461 | -0.6864394161 |
| C7   | -1.3840632361 | -1.0375062861 | -1.7689454036 |
| H8   | -2.0873115901 | -2.3441864909 | -0.4106370059 |
| C9   | -2.7528736743 | -0.9292981465 | -2.366046757  |
| C10  | -0.2598036003 | -0.9072058311 | -2.7500273264 |
| H11  | -3.498614722  | -0.9492254416 | -1.5783856349 |
| H12  | -2.9338975519 | -1.7482895303 | -3.0576304514 |
| H13  | -2.8554463375 | 0.004247993   | -2.9125304155 |
| H14  | -0.2164061168 | 0.1057266142  | -3.1425173524 |
| H15  | 0.693934857   | -1.160993492  | -2.3093734601 |
| H16  | -0.4344072219 | -1.5808241301 | -3.5840730876 |
| H17  | -0.8303590663 | 0.5336887387  | 1.9034313807  |
| H18  | -0.0463793023 | -1.0549619285 | 1.8446200225  |
| N19  | 1.297336587   | 0.5075175112  | 1.955868364   |
| N20  | 1.1775226829  | 1.9819857461  | 2.2077604161  |
| C21  | 1.3840632361  | 1.0375062861  | 3.2902664036  |
| H22  | 2.0873115901  | 2.3441864909  | 1.9319580059  |
| C23  | 2.7528736743  | 0.9292981465  | 3.887367757   |
| C24  | 0.2598036003  | 0.9072058311  | 4.2713483264  |
| H25  | 3.498614722   | 0.9492254416  | 3.0997066349  |
| H26  | 2.9338975519  | 1.7482895303  | 4.5789514514  |
| H27  | 2.8554463375  | -0.004247993  | 4.4338514155  |
| H28  | 0.2164061168  | -0.1057266142 | 4.6638383524  |
| H29  | -0.693934857  | 1.160993492   | 3.8306944601  |
| H30  | 0.4344072219  | 1.5808241301  | 5.1053940876  |

**Table S13.** Cartesian coordinates of the *enantiomeric* form of tetramazine found by the MP2/cc-pVTZ calculation.

| Atom | X             | Y             | Z             |
|------|---------------|---------------|---------------|
| C1   | -0.0014800069 | 0.018632132   | 0.007644832   |
| C2   | -0.0014800069 | -0.018632132  | 1.516401168   |
| H3   | 0.9387857439  | -0.3950637696 | -0.3491238088 |
| H4   | -0.0835396154 | 1.0531983257  | -0.319940603  |
| N5   | -1.1517313381 | -0.7047505671 | -0.5018992994 |
| N6   | -0.7779250514 | -2.1405008036 | -0.7266890299 |
| C7   | -1.070550266  | -1.2459626483 | -1.8320099144 |
| H8   | -1.6317884021 | -2.6439893192 | -0.4978441588 |
| C9   | -2.4019744739 | -1.3633802571 | -2.5071735515 |
| C10  | 0.0720739252  | -0.9433588652 | -2.7528498604 |
| H11  | -3.1784834745 | -1.4957484876 | -1.7612774635 |
| H12  | -2.4098744194 | -2.2059111043 | -3.194255346  |
| H13  | -2.62037499   | -0.4622602428 | -3.0738554642 |
| H14  | -0.0229097778 | 0.0620523623  | -3.155580665  |
| H15  | 1.0294655845  | -1.0423535787 | -2.2610165522 |
| H16  | 0.0516425619  | -1.6394471669 | -3.586534717  |
| H17  | 0.9387857439  | 0.3950637696  | 1.8731698088  |
| H18  | -0.0835396154 | -1.0531983257 | 1.843986603   |
| N19  | -1.1517313381 | 0.7047505671  | 2.0259452994  |
| N20  | -0.7779250514 | 2.1405008036  | 2.2507350299  |
| C21  | -1.070550266  | 1.2459626483  | 3.3560559144  |
| H22  | -1.6317884021 | 2.6439893192  | 2.0218901588  |
| C23  | -2.4019744739 | 1.3633802571  | 4.0312195515  |
| C24  | 0.0720739252  | 0.9433588652  | 4.2768958604  |
| H25  | -3.1784834745 | 1.4957484876  | 3.2853234635  |
| H26  | -2.4098744194 | 2.2059111043  | 4.718301346   |
| H27  | -2.62037499   | 0.4622602428  | 4.5979014642  |
| H28  | -0.0229097778 | -0.0620523623 | 4.679626665   |
| H29  | 1.0294655845  | 1.0423535787  | 3.7850625522  |
| H30  | 0.0516425619  | 1.6394471669  | 5.110580717   |

**Table S14.** Cartesian coordinates of the *meso* form of tetramezine found by the B3LYP/cc-pVTZ calculation.

| Atom | X             | Y             | Z             |
|------|---------------|---------------|---------------|
| C1   | -0.0134944331 | 0.0068151326  | -0.001125686  |
| C2   | 0.0134944331  | -0.0068151326 | 1.522446686   |
| H3   | 0.8571512314  | -0.5320880762 | -0.378414785  |
| H4   | 0.0384056908  | 1.0410094671  | -0.3505556296 |
| N5   | -1.2827456566 | -0.547735023  | -0.4654211787 |
| N6   | -1.1847284125 | -2.0165302399 | -0.7359637849 |
| C7   | -1.3970918533 | -1.0578349402 | -1.8114694736 |
| H8   | -2.0825504082 | -2.3966030191 | -0.4426462735 |
| C9   | -2.7827179102 | -0.9251298167 | -2.4032746776 |
| C10  | -0.2772390776 | -0.9350930493 | -2.8206164204 |
| H11  | -3.5338970984 | -0.9435095486 | -1.6148404445 |
| H12  | -2.9813266241 | -1.7363313245 | -3.1070988076 |
| H13  | -2.8820691599 | 0.0178422468  | -2.944410884  |
| H14  | -0.2503043812 | 0.0705403856  | -3.2453481474 |
| H15  | 0.6908707717  | -1.1610953124 | -2.3844981482 |
| H16  | -0.4466816607 | -1.6359059214 | -3.6396554915 |
| H17  | -0.8571512314 | 0.5320880762  | 1.899735785   |
| H18  | -0.0384056908 | -1.0410094671 | 1.8718766296  |
| N19  | 1.2827456566  | 0.547735023   | 1.9867421787  |
| N20  | 1.1847284125  | 2.0165302399  | 2.2572847849  |
| C21  | 1.3970918533  | 1.0578349402  | 3.3327904736  |
| H22  | 2.0825504082  | 2.3966030191  | 1.9639672735  |
| C23  | 2.7827179102  | 0.9251298167  | 3.9245956776  |
| C24  | 0.2772390776  | 0.9350930493  | 4.3419374204  |
| H25  | 3.5338970984  | 0.9435095486  | 3.1361614445  |
| H26  | 2.9813266241  | 1.7363313245  | 4.6284198076  |
| H27  | 2.8820691599  | -0.0178422468 | 4.465731884   |
| H28  | 0.2503043812  | -0.0705403856 | 4.7666691474  |
| H29  | -0.6908707717 | 1.1610953124  | 3.9058191482  |
| H30  | 0.4466816607  | 1.6359059214  | 5.1609764915  |

**Table S15.** Cartesian coordinates of the *enantiomeric* form of tetramazine found by the B3LYP /cc-pVTZ calculation.

| Atom | X             | Y             | Z             |
|------|---------------|---------------|---------------|
| C1   | -0.0017543912 | 0.0015660669  | -0.0000022996 |
| C2   | -0.0017543912 | -0.0015660669 | 1.5240482996  |
| H3   | 0.9643586277  | -0.3775223992 | -0.3422615386 |
| H4   | -0.1139851828 | 1.0288694544  | -0.3547189628 |
| N5   | -1.1203113107 | -0.7755291491 | -0.5285022878 |
| N6   | -0.7247997979 | -2.1933238686 | -0.7972811477 |
| C7   | -1.0661334406 | -1.2803486868 | -1.8798966724 |
| H8   | -1.5451880287 | -2.7436076021 | -0.5510458009 |
| C9   | -2.420273544  | -1.4119774104 | -2.5412230979 |
| C10  | 0.0559612293  | -0.9336275108 | -2.8339905309 |
| H11  | -3.1910987224 | -1.5830413429 | -1.7911208565 |
| H12  | -2.4227656425 | -2.2387722682 | -3.2549920323 |
| H13  | -2.6733574641 | -0.5002290862 | -3.0858335383 |
| H14  | -0.0950389428 | 0.0604710714  | -3.2600278051 |
| H15  | 1.0288774266  | -0.9681792084 | -2.3532474611 |
| H16  | 0.0668422593  | -1.6485032843 | -3.6583666047 |
| H17  | 0.9643586277  | 0.3775223992  | 1.8663075386  |
| H18  | -0.1139851828 | -1.0288694544 | 1.8787649628  |
| N19  | -1.1203113107 | 0.7755291491  | 2.0525482878  |
| N20  | -0.7247997979 | 2.1933238686  | 2.3213271477  |
| C21  | -1.0661334406 | 1.2803486868  | 3.4039426724  |
| H22  | -1.5451880287 | 2.7436076021  | 2.0750918009  |
| C23  | -2.420273544  | 1.4119774104  | 4.0652690979  |
| C24  | 0.0559612293  | 0.9336275108  | 4.3580365309  |
| H25  | -3.1910987224 | 1.5830413429  | 3.3151668565  |
| H26  | -2.4227656425 | 2.2387722682  | 4.7790380323  |
| H27  | -2.6733574641 | 0.5002290862  | 4.6098795383  |
| H28  | -0.0950389428 | -0.0604710714 | 4.7840738051  |
| H29  | 1.0288774266  | 0.9681792084  | 3.8772934611  |
| H30  | 0.0668422593  | 1.6485032843  | 5.1824126047  |
